# Supplementary material for: Dual FLT3/TOPK inhibitor with activity against FLT3-ITD secondary mutations potently inhibits acute myeloid leukemia cell lines
Source: PubMed Central journal article supplement — Future Med Chem. 2018 Feb 13;10(7):823–35. doi: 10.4155/fmc-2017-0298 (PMC6367750; doi:10.4155/fmc-2017-0298), 2018-02-13

# Dual FLT3/TOPK inhibitor with activity against FLT3-ITD secondary mutations potently inhibits AML cell lines

## Supplemental Experimental procedures

### Chemistry

**General Considerations** Unless noted otherwise, all reagents and solvents were purchased from commercial sources and used as received. All reactions were performed in a screw-cap sealed vials. The  $^1\text{H}$  and  $^{13}\text{C}$  NMR spectra were obtained in  $\text{CD}_3\text{OD}$  or  $(\text{CD}_3)_2\text{SO}$  as solvent using a 500 MHz spectrometer with  $\text{Me}_4\text{Si}$  as an internal standard. Chemical shifts are reported in parts per million ( $\delta$ ) and are calibrated using residual undeuterated solvent as an internal reference. Data for  $^1\text{H}$  NMR spectra are reported as follows: chemical shift ( $\delta$  ppm) (multiplicity, coupling constant (Hz), integration). Multiplicities are reported as follows: s = singlet, d = doublet, t = triplet, q = quartet, m = multiplet, or combinations thereof. High resolution mass spectra (HRMS) were obtained using electron spray ionization (ESI) technique and as TOF mass analyzer. New compounds were characterized by  $^1\text{H}$  NMR,  $^{13}\text{C}$  NMR, and HRMS data. Substrate 3-(Trifluoromethyl)-1H-pyrazole-4-carbaldehyde and 5-amino indazole were purchased from 1Chem (95% purity) and Ark Pharm (98% purity) respectively.

### General procedure for the multicomponent reaction:

A mixture of amine (1 mmol) and aldehyde (1 mmol) in 4 mL of absolute ethanol was refluxed for 2 h followed by addition of cyclic ketone or acetone (2.1 mmol) to the reaction mixture. A catalytic amount of conc. hydrochloric acid was added and the reaction was continued to reflux for 6-12 h. Reaction mixture was dissolved in ethylacetate (50 mL), washed with sodium bicarbonate and brine solution (20 mL X 2). The organic layer was dried ( $\text{Na}_2\text{SO}_4$ ), concentrated under reduced pressure, and purified by silica gel chromatography (dichloromethane:methanol (99:01 to 80:20) to give the desired cyclized compound.

**9-Methyl-7-(3-(trifluoromethyl)-1H-pyrazol-4-yl)-3H-pyrazolo[4,3-f]quinolone (1)**

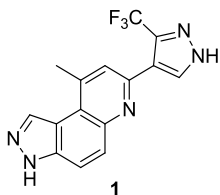

Off-white solid (136 mg, 43%).  $^1\text{H}$  NMR (500 MHz, MeOD)  $\delta$  8.51 (s, 1H), 8.29 – 8.21 (m, 1H), 7.91 – 7.81 (m, 2H), 7.62 (s, 1H), 2.89 (s, 3H);  $^{13}\text{C}$  NMR (126 MHz, MeOD)  $\delta$  147.45, 145.74, 144.37, 139.03, 138.40, 135.27, 130.97, 128.87, 125.13 ( $J = 269.64$  Hz), 122.50, 121.51, 120.86, 116.35, 114.74, 21.45; HRMS (ESI)  $m/z$  calcd for  $\text{C}_{15}\text{H}_{11}\text{F}_3\text{N}_5$   $[\text{M} + \text{H}]^+$  318.0967, found 318.0971.

**7-(3-(Trifluoromethyl)-1H-pyrazol-4-yl)-8,9-dihydro-3H-cyclobuta[c]pyrazolo[4,3-f]quinolone (2)**

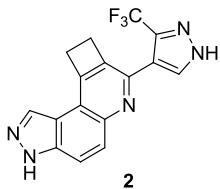

Off-white solid (49 mg, 15%).  $^1\text{H}$  NMR (500 MHz, MeOD)  $\delta$  8.69 (d,  $J = 0.9$  Hz, 1H), 8.53 (d,  $J = 0.9$  Hz, 1H), 8.32 (dd,  $J = 9.4, 1.0$  Hz, 1H), 8.11 (d,  $J = 9.4$  Hz, 1H), 4.01 – 3.93 (m, 2H), 3.72 (t,  $J = 4.0$  Hz, 2H).  $^{13}\text{C}$  NMR (126 MHz, MeOD)  $\delta$  161.67, 140.75, 139.64, 137.73, 136.67, 133.55, 133.12, 122.29 (q,  $J = 268.38$  Hz), 121.46, 119.65, 119.42, 113.74, 108.80, 30.70, 29.72; HRMS (ESI)  $m/z$  calcd for  $\text{C}_{16}\text{H}_{11}\text{F}_3\text{N}_5$   $[\text{M} + \text{H}]^+$  330.0967, found 330.0970.

**7-(3-(Trifluoromethyl)-1H-pyrazol-4-yl)-3,8,9,10-tetrahydrocyclopenta[c]pyrazolo[4,3-f]quinolone (3)**

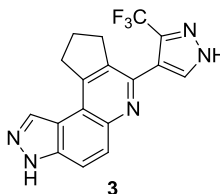

Off-white solid (185 mg, 54%).  $^1\text{H}$  NMR (500 MHz, MeOD)  $\delta$  8.76 (s, 1H), 8.44 (s, 1H), 8.33 (d,  $J = 9.3$  Hz, 1H), 8.05 (d,  $J = 9.3$  Hz, 1H), 3.86 (t,  $J = 7.7$  Hz, 2H), 3.21 (t,  $J = 7.7$  Hz, 2H),

2.57– 2.53 (m, 2H);  $^{13}\text{C}$  NMR (126 MHz, MeOD)  $\delta$  160.67, 141.10, 140.00, 138.86, 136.50, 133.37, 132.59, 122.32(q,  $J = 269.64$  Hz), 121.78, 121.15, 118.59, 115.19, 110.20, 35.03, 30.90, 23.82; HRMS (ESI)  $m/z$  calcd for  $\text{C}_{17}\text{H}_{13}\text{F}_3\text{N}_5$   $[\text{M} + \text{H}]^+$  334.1123, found 334.1121.

**7-(3-(Trifluoromethyl)-1H-pyrazol-4-yl)-8,9,10,11-tetrahydro-3H-pyrazolo[4,3-*a*]phenanthridine (4)**

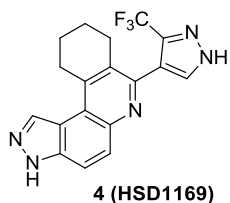

Off-white solid (161 mg, 45%).  $^1\text{H}$  NMR (500 MHz,  $\text{DMSO}-d_6$ )  $\delta$  8.55 (s, 1H), 8.22 (s, 1H), 7.85 (d,  $J = 9.1$  Hz, 1H), 7.77 (d,  $J = 9.1$  Hz, 1H), 3.26 (t,  $J = 6.4$  Hz, 2H), 2.68 (t,  $J = 6.2$  Hz, 2H), 1.98 – 1.86 (m, 2H), 1.80 – 1.69 (m, 2H);  $^{13}\text{C}$  NMR (126 MHz, DMSO)  $\delta$  148.52, 143.61, 141.99, 139.65, 139.37(q,  $J = 35.28$ Hz), 135.14, 131.28, 130.36, 129.53, 123.56(q,  $J = 269.64$ Hz), 121.99, 119.73, 116.21, 115.24, 29.48, 28.17, 22.51, 22.29; HRMS (ESI)  $m/z$  calcd for  $\text{C}_{18}\text{H}_{15}\text{F}_3\text{N}_5$   $[\text{M} + \text{H}]^+$  358.1280, found 358.1286.

**7-(3-(Trifluoromethyl)-1H-pyrazol-4-yl)-3,8,9,10,11,12hexahydrocyclohepta[*c*]pyrazolo[4,3-*f*]quinolone (5)**

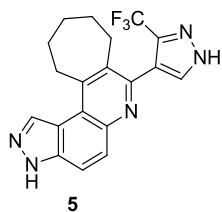

Off-white solid (185 mg, 50%).  $^1\text{H}$  NMR (500 MHz, MeOD)  $\delta$  8.98 – 8.87 (m, 1H), 8.37 – 8.27 (m, 2H), 7.99 (d,  $J = 9.2$  Hz, 1H), 3.86 (d,  $J = 5.3$  Hz, 2H), 3.17 – 3.04 (m, 2H), 2.05 – 2.03 (m, 4H), 1.78 – 1.65 (m, 2H);  $^{13}\text{C}$  NMR (126 MHz, MeOD)  $\delta$  160.75, 140.27, 136.43, 133.66, 132.53, 123.83, 122.46, 122.13, 121.07, 120.17(q,  $J = 269.64$  Hz), 118.79, 114.94, 114.65, 110.56, 110.56, 32.30, 30.64, 29.52, 25.85, 23.75; HRMS (ESI)  $m/z$  calcd for  $\text{C}_{19}\text{H}_{17}\text{F}_3\text{N}_5$   $[\text{M} + \text{H}]^+$  372.1436, found 372.1429.

**9-Methyl-7-(3-(trifluoromethyl)-1H-pyrazol-4-yl)-8,9,10,11-tetrahydro-3H-pyrazolo[4,3-*a*]phenanthridine (6)**

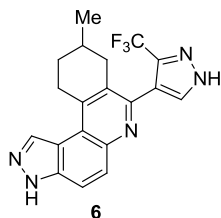

Off-white solid (178 mg, 48%). <sup>1</sup>H NMR (500 MHz, MeOD) δ 8.60 (s, 1H), 7.97 (d, *J* = 1.1 Hz, 1H), 7.86 (s, 2H), 3.56 – 3.48 (m, 1H), 3.39 – 3.32 (m, 1H), 2.77 – 2.70 (m, 1H), 2.38 – 2.28 (m, 1H), 2.27 – 2.18 (m, 1H), 1.97 – 1.85 (m, 1H), 1.66 – 1.53 (m, 1H), 1.09 (d, *J* = 6.5 Hz, 3H); <sup>13</sup>C NMR (126 MHz, MeOD) δ 148.72, 143.06, 142.82, 139.74 (*J* = 28.98 Hz) 134.66, 131.35, 131.12, 131.01, 128.37, 123.01, 122.23, 120.84 (*J* = 269.64 Hz), 115.93, 114.67, 36.13, 30.14, 29.44, 28.15, 20.47; HRMS (ESI) *m/z* calcd for C<sub>19</sub>H<sub>17</sub>F<sub>3</sub>N<sub>5</sub> [M + H]<sup>+</sup> 372.1436, found 372.1440.

**7-(3-(Trifluoromethyl)-1H-pyrazol-4-yl)-8,9,10,11-tetrahydro-3H-pyrazolo[4,3-*a*]phenanthridin-9-amine (7)**

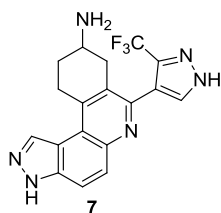

Off-white solid (137 mg, 37%). <sup>1</sup>H NMR (500 MHz, MeOD) δ 8.57 (d, *J* = 7.7 Hz, 1H), 8.03 – 8.00 (m, 1H), 7.87 – 7.83 (m, 2H), 3.92 – 3.82 (m, 1H), 3.65 – 3.53 (m, 1H), 3.49 – 3.38 (m, 1H), 2.81 – 2.65 (m, 2H), 2.25 – 2.17 (m, 1H), 2.08 – 1.96 (m, 1H); <sup>13</sup>C NMR (126 MHz, MeOD) δ 148.28, 143.27, 142.44, 142.22, 139.73, 134.64, 130.59, 129.31, 128.37, 122.83(*q*, *J* = 269.64 Hz), 122.00, 118.74, 115.82, 114.97, 46.06, 36.25, 30.30, 28.58; HRMS (ESI) *m/z* calcd for C<sub>18</sub>H<sub>16</sub>F<sub>3</sub>N<sub>6</sub> [M + H]<sup>+</sup> 373.1389, found 373.1393.

**7-(1H-Pyrazol-4-yl)-8,9,10,11-tetrahydro-3H-pyrazolo[4,3-*a*]phenanthridine (8)**

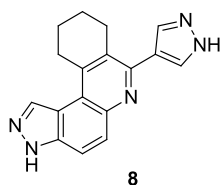

White solid (220 mg, 76%).  $^1\text{H}$  NMR (500 MHz,  $\text{DMSO-}d_6$ )  $\delta$  8.52 (s, 1H), 8.14 (s, 2H), 7.79 (d,  $J = 5.4$  Hz, 2H), 3.28 (d,  $J = 6.7$  Hz, 2H), 2.99 (t,  $J = 6.1$  Hz, 2H), 1.98 (ddt,  $J = 9.0, 6.4, 3.2$  Hz, 2H), 1.84 – 1.82 (m, 2H);  $^{13}\text{C}$  NMR (126 MHz,  $\text{DMSO}$ )  $\delta$  149.72, 143.79, 142.11, 138.53, 136.11, 129.61, 128.83, 121.65, 121.03, 116.45, 114.22, 29.85, 28.67, 22.64, 22.48; HRMS (ESI)  $m/z$  calcd for  $\text{C}_{17}\text{H}_{16}\text{N}_5$   $[\text{M} + \text{H}]^+$  290.1406, found 290.1399.

### 7-(3-Methyl-1H-pyrazol-4-yl)-8,9,10,11-tetrahydro-3H-pyrazolo[4,3-*a*]phenanthridine (9)

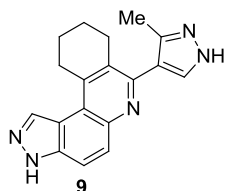

Off-white solid (179 mg, 59%).  $^1\text{H}$  NMR (500 MHz,  $\text{DMSO-}d_6$ )  $\delta$  8.53 (s, 1H), 7.84 – 7.74 (m, 3H), 3.33 (s, 3H), 2.85 (t,  $J = 6.1$  Hz, 2H), 2.33 (s, 2H), 2.00 – 1.97 (m, 2H), 1.81 – 1.77 (m, 2H);  $^{13}\text{C}$  NMR (126 MHz,  $\text{DMSO}$ )  $\delta$  151.10, 143.71, 141.83, 138.63, 136.21, 130.12, 129.59, 121.02, 118.17, 116.48, 114.04, 29.70, 28.62, 22.63; HRMS (ESI)  $m/z$  calcd for  $\text{C}_{18}\text{H}_{18}\text{N}_5$   $[\text{M} + \text{H}]^+$  304.1562, found 304.1552.

### 7-(3,5-Dimethyl-1H-pyrazol-4-yl)-8,9,10,11-tetrahydro-3H-pyrazolo[4,3-*a*]phenanthridine (10)

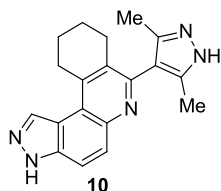

Off-white solid (193 mg, 60%).  $^1\text{H}$  NMR (500 MHz,  $\text{DMSO-}d_6$ )  $\delta$  8.58 – 8.53 (m, 1H), 7.82 (dd,  $J = 9.1, 0.9$  Hz, 1H), 7.76 (d,  $J = 9.0$  Hz, 1H), 3.30 (t,  $J = 6.5$  Hz, 2H), 2.56 (t,  $J = 6.2$  Hz, 2H), 2.00 (s, 8H), 1.76 (qd,  $J = 8.6, 7.2, 4.1$  Hz, 2H);  $^{13}\text{C}$  NMR (126 MHz,  $\text{DMSO}$ )  $\delta$  151.69, 144.07, 141.77, 139.31, 135.31, 131.30, 129.63, 121.60, 117.69, 116.32, 114.93, 29.51, 27.72, 22.74, 22.45; HRMS (ESI)  $m/z$  calcd for  $\text{C}_{19}\text{H}_{20}\text{N}_5$   $[\text{M} + \text{H}]^+$  318.1719, found 318.1710.

**7-(1,3-Dimethyl-1H-pyrazol-4-yl)-8,9,10,11-tetrahydro-3H-pyrazolo[4,3-*a*]phenanthridine (11)**

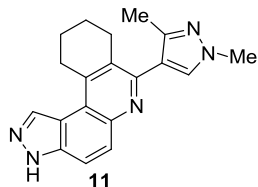

Off-white solid (180 mg, 57%).  $^1\text{H}$  NMR (500 MHz,  $\text{DMSO-}d_6$ )  $\delta$  8.53 (s, 1H), 7.92 (s, 1H), 7.81 (d,  $J = 9.0$  Hz, 1H), 7.76 (d,  $J = 9.1$  Hz, 1H), 3.82 (s, 3H), 3.27 (t,  $J = 6.5$  Hz, 2H), 2.81 (t,  $J = 6.2$  Hz, 2H), 2.26 (s, 3H), 2.01 – 1.88 (m, 2H), 1.82 – 1.67 (m, 2H);  $^{13}\text{C}$  NMR (126 MHz,  $\text{DMSO}$ )  $\delta$  150.70, 147.24, 143.71, 141.82, 139.32, 135.07, 131.72, 129.87, 129.57, 121.05, 118.85, 116.35, 114.88, 38.70, 29.70, 28.60, 22.60, 13.53; HRMS (ESI)  $m/z$  calcd for  $\text{C}_{19}\text{H}_{20}\text{N}_5$   $[\text{M} + \text{H}]^+$  318.1719, found 318.1709.

**7-(1H-1,2,3-Triazol-4-yl)-8,9,10,11-tetrahydro-3H-pyrazolo[4,3-*a*]phenanthridine (12)**

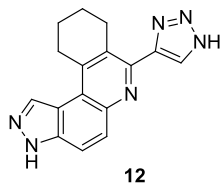

Off-white solid (159 mg, 55%).  $^1\text{H}$  NMR (500 MHz,  $\text{DMSO-}d_6$ )  $\delta$  8.57 (s, 1H), 8.31 (d,  $J = 1.9$  Hz, 1H), 7.87 (d,  $J = 9.2$  Hz, 1H), 7.82 (dd,  $J = 9.1, 1.9$  Hz, 1H), 3.30 (d,  $J = 6.6$  Hz, 2H), 3.12 (d,  $J = 6.4$  Hz, 2H), 2.05 – 1.94 (m, 2H), 1.86 – 1.81 (m, 2H);  $^{13}\text{C}$  NMR (126 MHz,  $\text{DMSO}$ )  $\delta$  146.46, 143.65, 142.93, 131.52, 129.80, 129.48, 122.18, 116.16, 115.49, 29.87, 28.27, 22.37; HRMS (ESI)  $m/z$  calcd for  $\text{C}_{16}\text{H}_{15}\text{N}_6$   $[\text{M} + \text{H}]^+$  291.1358, found 291.1349.

**7-(5-(Trifluoromethyl)-1H-pyrazol-3-yl)-8,9,10,11-tetrahydro-3H-pyrazolo[4,3-*a*]phenanthridine (13)**

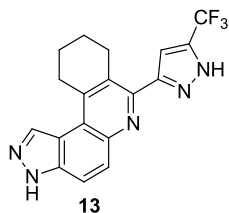

Off-white solid (150 mg, 42%).  $^1\text{H}$  NMR (500 MHz,  $\text{DMSO-}d_6$ )  $\delta$  8.56 (s, 1H), 7.91 (d,  $J = 8.7$  Hz, 2H), 7.17 (s, 1H), 3.33 – 3.28 (m, 2H), 3.00 (t,  $J = 6.2$  Hz, 2H), 2.02 – 1.95 (m, 2H), 1.88 –

1.80 (m, 2H);  $^{13}\text{C}$  NMR (126 MHz, DMSO)  $\delta$  144.59, 143.32, 142.97, 142.16, ( $J = 36.83$  Hz), 138.87, 136.55, 129.44, 125.49 ( $J = 270.51$  Hz), 122.50, 116.27, 115.12, 104.88, 29.83, 27.83, 22.26, 22.22; HRMS (ESI)  $m/z$  calcd for  $\text{C}_{18}\text{H}_{15}\text{F}_3\text{N}_5$   $[\text{M} + \text{H}]^+$  358.1280, found 358.1282.

**7-(3-Phenyl-1*H*-pyrazol-4-yl)-8,9,10,11-tetrahydro-3*H*-pyrazolo[4,3-*a*]phenanthridine (14)**

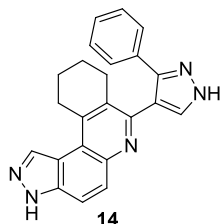

Off-white solid (168 mg, 45%).  $^1\text{H}$  NMR (500 MHz, DMSO- $d_6$ )  $\delta$  8.81 (s, 1H), 8.27 (d,  $J = 9.1$  Hz, 2H), 8.17 (d,  $J = 9.2$  Hz, 1H), 7.35 – 7.22 (m, 5H), 3.51 – 3.43 (m, 2H), 2.55 – 2.49 (m, 2H), 1.95 – 1.82 (m, 2H), 1.72 – 1.61 (m, 2H);  $^{13}\text{C}$  NMR (126 MHz, DMSO)  $\delta$  145.52, 135.52, 132.94, 129.41, 128.96, 128.85, 128.19, 126.99, 123.39, 120.03, 114.91, 109.66, 30.80, 27.32, 21.75, 21.27; HRMS (ESI)  $m/z$  calcd for  $\text{C}_{23}\text{H}_{20}\text{N}_5$   $[\text{M} + \text{H}]^+$  366.1719, found 366.1726.

**7-(3-(Pyridin-3-yl)-1*H*-pyrazol-4-yl)-8,9,10,11-tetrahydro-3*H*-pyrazolo[4,3-*a*]phenanthridine (15)**

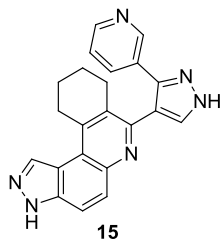

Off-white solid (172 mg, 47  $^1\text{H}$  NMR (500 MHz, DMSO- $d_6$ )  $\delta$  8.57 (s, 1H), 8.48 (s, 1H), 8.40 – 8.31 (m, 1H), 7.99 (s, 1H), 7.83 (d,  $J = 9.1$  Hz, 1H), 7.78 – 7.63 (m, 2H), 7.25 (dd,  $J = 8.1, 4.8$  Hz, 1H), 3.34 – 3.22 (m, 2H), 2.58 (t,  $J = 6.2$  Hz, 2H), 1.96 – 1.83 (m, 2H), 1.73 – 1.65 (m, 2H);  $^{13}\text{C}$  NMR (126 MHz, DMSO)  $\delta$  150.81, 148.62, 147.71, 143.91, 143.51, 142.22, 140.11, 135.03, 134.04, 133.41, 130.51, 129.58, 129.11, 123.91, 121.95, 119.13, 116.29, 115.55, 29.57, 28.27, 22.59, 22.35; HRMS (ESI)  $m/z$  calcd for  $\text{C}_{22}\text{H}_{19}\text{N}_6$   $[\text{M} + \text{H}]^+$  367.1671, found 367.1661.

**7-(1-Phenyl-1H-pyrazol-4-yl)-8,9,10,11-tetrahydro-3H-pyrazolo[4,3-*a*]phenanthridine (16)**

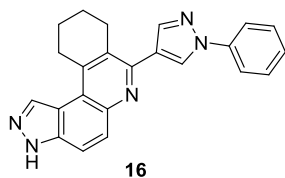

Off-white solid (186 mg, 51%).  $^1\text{H}$  NMR (500 MHz,  $\text{DMSO-}d_6$ )  $\delta$  8.89 (s, 1H), 8.55 (s, 1H), 8.29 (d,  $J = 1.7$  Hz, 1H), 7.95 (d,  $J = 8.3$  Hz, 2H), 7.88 – 7.81 (m, 2H), 7.55 – 7.49 (m, 2H), 7.36 – 7.30 (m, 1H), 3.31 (t,  $J = 6.4$  Hz, 2H), 2.58 (t,  $J = 6.1$  Hz, 2H), 1.94 – 1.85 (m, 2H), 1.74 – 1.65 (m, 2H);  $^{13}\text{C}$  NMR (126 MHz, DMSO)  $\delta$  150.93, 143.68, 142.18, 138.73, 136.97, 136.67, 136.31, 131.22, 130.28, 129.55, 127.67, 125.20, 123.94, 122.00, 118.02, 116.54, 114.31, 29.56, 28.10, 22.55, 22.32; HRMS (ESI)  $m/z$  calcd for  $\text{C}_{23}\text{H}_{20}\text{N}_5$   $[\text{M} + \text{H}]^+$  366.1719, found 366.1722.

**7-(3-(Thiophen-3-yl)-1H-pyrazol-4-yl)-8,9,10,11-tetrahydro-3H-pyrazolo[4,3-*a*]phenanthridine (17)**

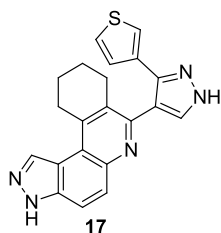

Off-white solid (177 mg, 46%).  $^1\text{H}$  NMR (500 MHz,  $\text{DMSO-}d_6$ )  $\delta$  8.56 (s, 1H), 8.03 – 7.91 (m, 1H), 7.88 – 7.76 (m, 2H), 7.39 – 7.23 (m, 1H), 6.80 (dt,  $J = 6.1, 3.0$  Hz, 1H), 6.62 (d,  $J = 3.2$  Hz, 1H), 3.35 – 3.32 (m, 2H), 2.70 – 2.54 (m, 2H), 1.98 – 1.84 (m, 2H), 1.79 – 1.63 (m, 2H);  $^{13}\text{C}$  NMR (126 MHz, DMSO)  $\delta$  148.63, 143.82, 142.45, 142.18, 141.18, 140.01, 139.07, 130.03, 129.57, 129.19, 127.95, 126.90, 124.53, 121.44, 119.01, 118.46, 116.29, 29.86, 28.53, 22.57, 22.45; HRMS (ESI)  $m/z$  calcd for  $\text{C}_{21}\text{H}_{18}\text{N}_5\text{S}$   $[\text{M} + \text{H}]^+$  372.1283, found 372.1274.

**7-(3-(*tert*-Butyl)-1H-pyrazol-4-yl)-8,9,10,11-tetrahydro-3H-pyrazolo[4,3-*a*]phenanthridine (18)**



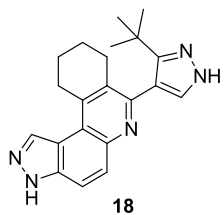

Off-white solid (176 mg, 51%).  $^1\text{H}$  NMR (500 MHz, MeOD)  $\delta$  8.55 (s, 1H), 7.88 – 7.79 (m, 2H), 7.53 (s, 1H), 3.37 – 3.31 (m, 2H), 2.67 (t,  $J$  = 6.2 Hz, 2H), 2.08 – 1.97 (m, 2H), 1.90 – 1.81 (m, 2H), 1.17 (s, 9H);  $^{13}\text{C}$  NMR (126 MHz, MeOD)  $\delta$  152.31, 143.08, 142.67, 138.68, 135.79, 131.90, 128.29, 122.19, 116.70, 116.13, 113.68, 32.29, 32.24, 29.44, 29.30, 28.47, 22.15, 21.89; HRMS (ESI)  $m/z$  calcd for  $\text{C}_{21}\text{H}_{24}\text{N}_5$   $[\text{M} + \text{H}]^+$  346.2032, found 346.2021.

**7-(3-(Trifluoromethyl)-1H-pyrazol-4-yl)-8,9,10,11-tetrahydro-3H-pyrrolo[3,2-*a*]phenanthridine (19)**

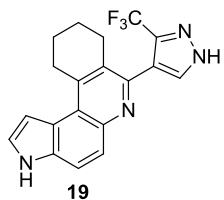

Off-white solid (135 mg, 38%).  $^1\text{H}$  NMR (500 MHz, MeOD)  $\delta$  7.92 (s, 1H), 7.79 (d,  $J$  = 9.0 Hz, 1H), 7.71 – 7.65 (m, 1H), 7.45 – 7.40 (m, 1H), 7.18 (d,  $J$  = 3.2 Hz, 1H), 3.46 (t,  $J$  = 6.4 Hz, 2H), 2.65 (t,  $J$  = 6.3 Hz, 2H), 2.00 – 1.86 (m, 2H), 1.85 – 1.86 (qd,  $J$  = 6.5, 3.2 Hz, 2H);  $^{13}\text{C}$  NMR (126 MHz, MeOD)  $\delta$  146.73, 143.44, 142.52, 133.34, 130.08, 129.00, 123.12, 122.85, 121.93, 120.17, 119.38, 116.04, 105.77, 29.74, 27.88, 22.38, 21.90; HRMS (ESI)  $m/z$  calcd for  $\text{C}_{19}\text{H}_{16}\text{F}_3\text{N}_4$   $[\text{M} + \text{H}]^+$  357.1327, found 357.1330.

**2-(4-(8,9,10,11-Tetrahydro-3H-pyrazolo[4,3-*a*]phenanthridin-7-yl)-1H-pyrazol-1-yl)ethan-1-ol (20)**

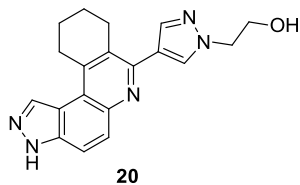

Off-white solid (126 mg, 38%).  $^1\text{H}$  NMR (500 MHz, MeOD)  $\delta$  8.51 (s, 1H), 8.12 (s, 1H), 7.99 (s, 1H), 7.87 (d,  $J$  = 9.2 Hz, 1H), 7.79 (d,  $J$  = 9.0 Hz, 1H), 4.34 (t,  $J$  = 5.4 Hz, 2H), 3.97 (t,  $J$  = 5.4

Hz, 2H), 3.35 – 3.32 (m, 2H), 3.00 (t,  $J = 6.2$  Hz, 2H), 2.10 – 2.03 (m, 2H), 1.95 – 1.86 (m, 2H).  $^{13}\text{C}$  NMR (126 MHz, MeOD)  $\delta$  149.36, 143.28, 143.07, 139.58, 138.49, 135.72, 131.37, 129.45, 128.70, 121.71, 121.43, 116.16, 113.49, 60.48, 54.17, 29.73, 28.38, 22.12, 22.03; HRMS (ESI)  $m/z$  calcd for  $\text{C}_{19}\text{H}_{20}\text{N}_5\text{O}$   $[\text{M} + \text{H}]^+$  334.1668, found 334.1666.

#### 4-(8,9,10,11-Tetrahydro-3H-pyrazolo[4,3-*a*]phenanthridin-7-yl)-1H-pyrazole-3-carboxylic acid (21)

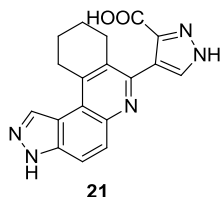

Off-white solid (167 mg, 50%).  $^1\text{H}$  NMR (500 MHz,  $\text{DMSO-}d_6$ )  $\delta$  8.62 (s, 1H), 8.25 (s, 1H), 7.99 (d,  $J = 9.1$  Hz, 1H), 7.76 (d,  $J = 9.4$  Hz, 1H), 3.30 (t,  $J = 6.5$  Hz, 2H), 2.93 – 2.78 (m, 2H), 2.03 – 1.91 (m, 2H), 1.83 – 1.74 (m, 2H);  $^{13}\text{C}$  NMR (126 MHz, DMSO)  $\delta$  162.03, 148.76, 145.57, 139.73, 137.07, 136.25, 131.58, 128.69, 123.61, 122.18, 121.89, 116.71, 115.13, 30.40, 28.34, 21.77. HRMS (ESI)  $m/z$  calcd for  $\text{C}_{18}\text{H}_{16}\text{N}_5\text{O}_2$   $[\text{M} + \text{H}]^+$  334.1304, found 334.1308.

#### HPLC Data

Condition: Agilent Eclipse plus C18 column, 3.5  $\mu\text{m}$ , 4.6 $\times$ 100 mm, 0 $\rightarrow$ 4 min, 50% B, 5 $\rightarrow$ 14 min, 100% B, 15 $\rightarrow$ 20 min, 100% A (A: 0.1%  $\text{NH}_4\text{OH}$  in  $\text{H}_2\text{O}$ , B: MeOH), 55  $^\circ\text{C}$ .

#### HPLC of compound HSD1169

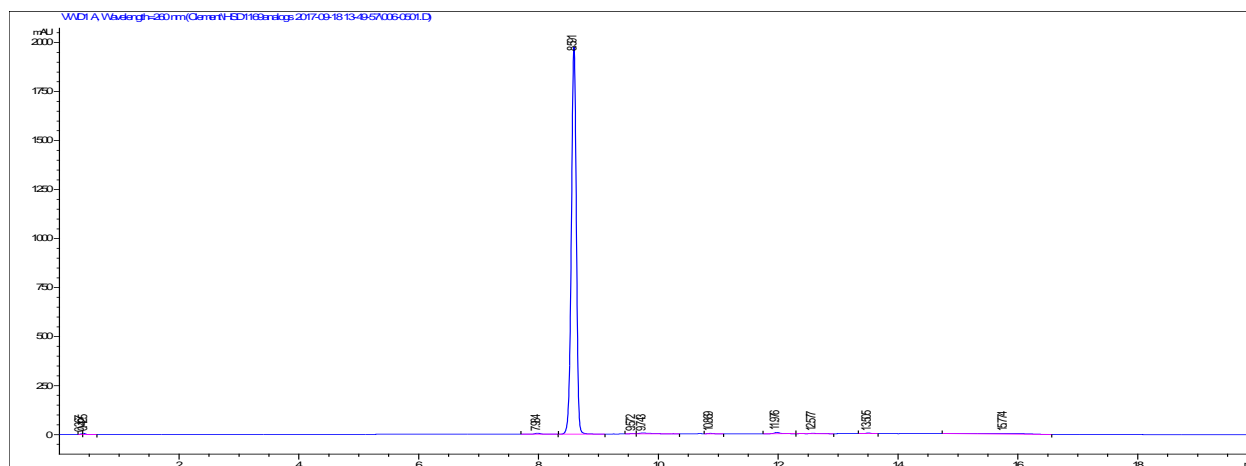

## HPLC of compound 1

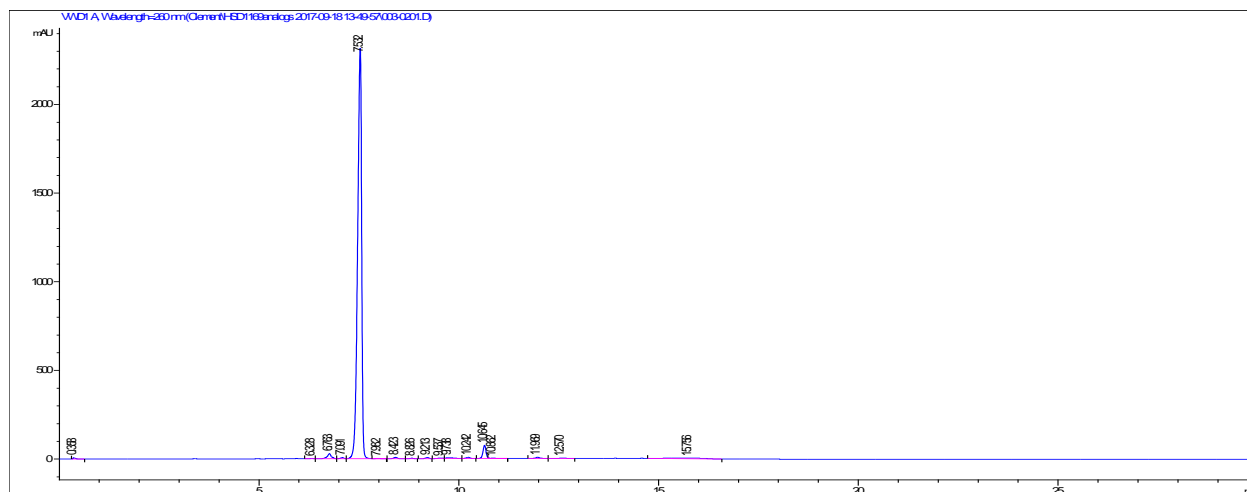

## HPLC of compound 2

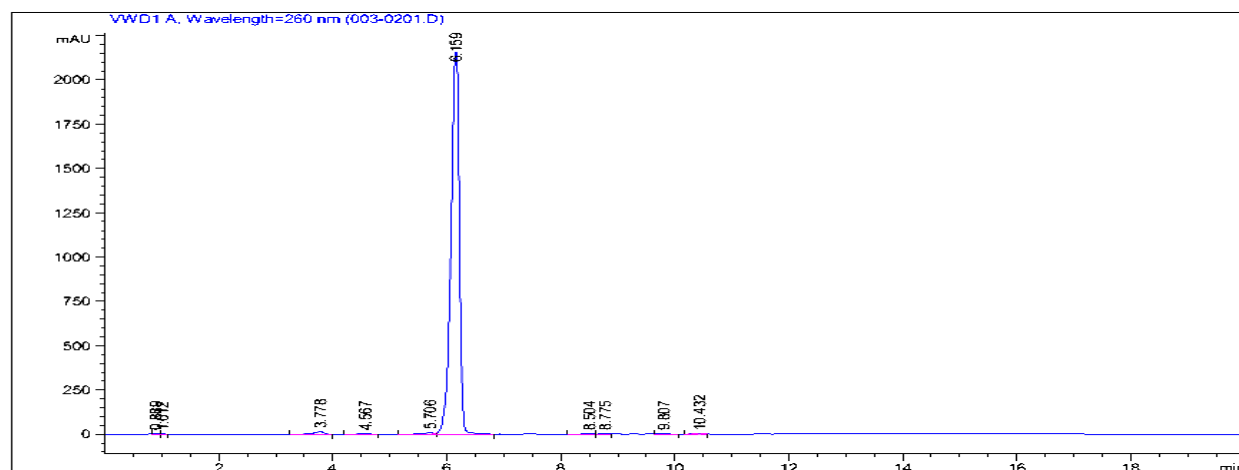

## HPLC of compound 3

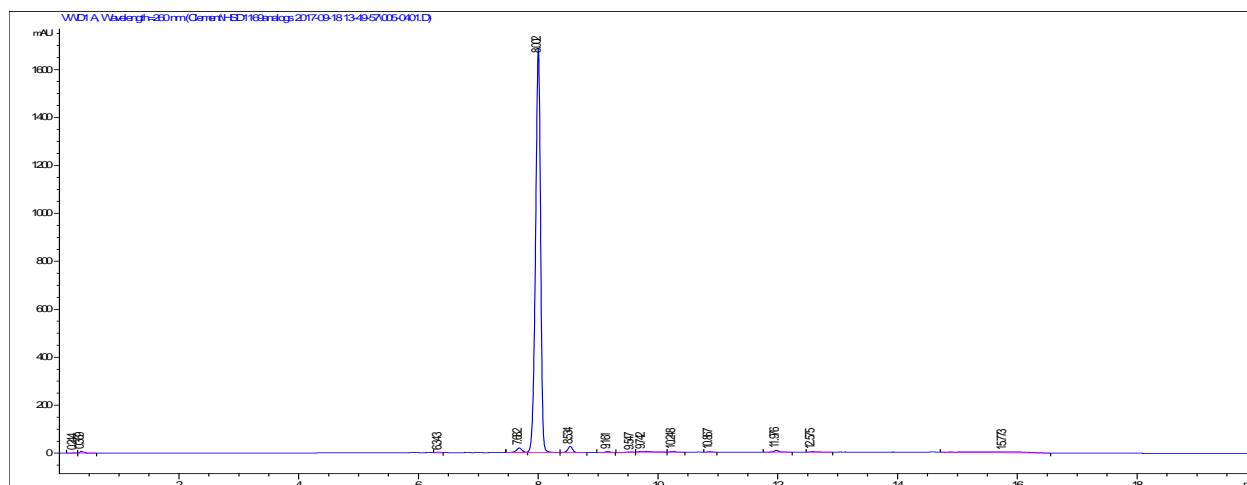

## HPLC of compound 5

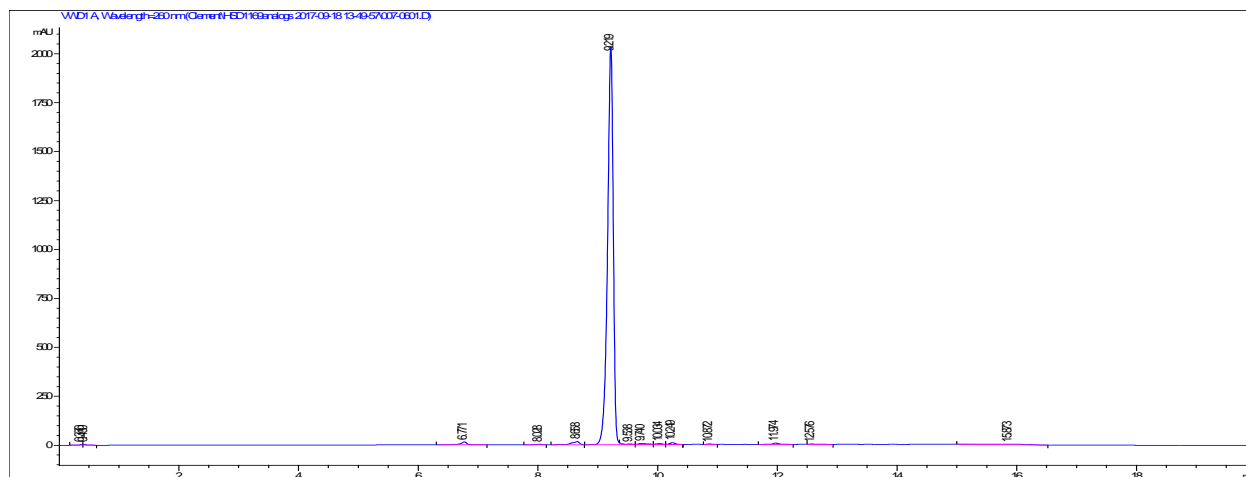

## HPLC of compound 6

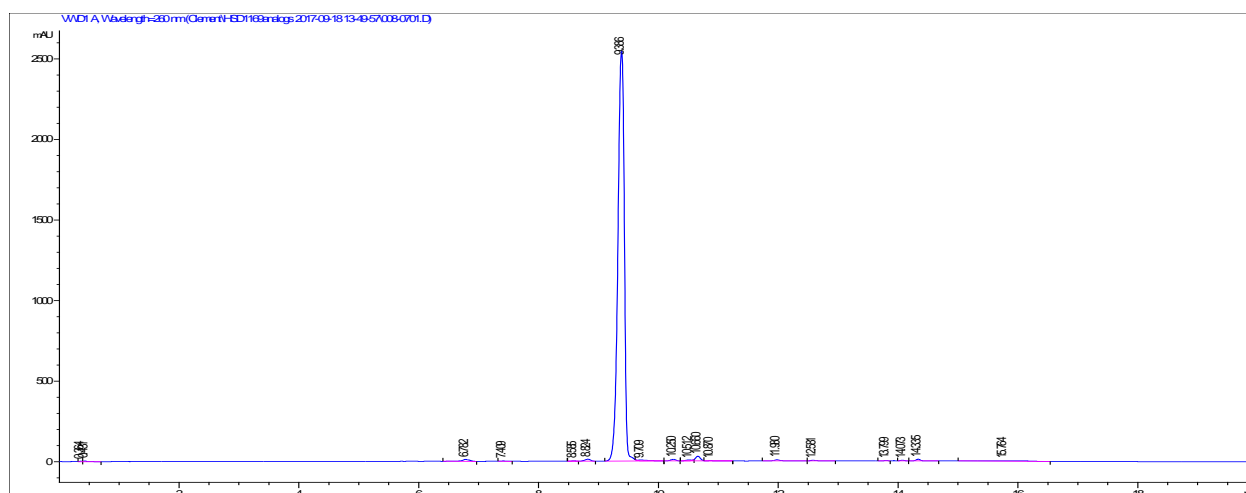

## HPLC of compound 7

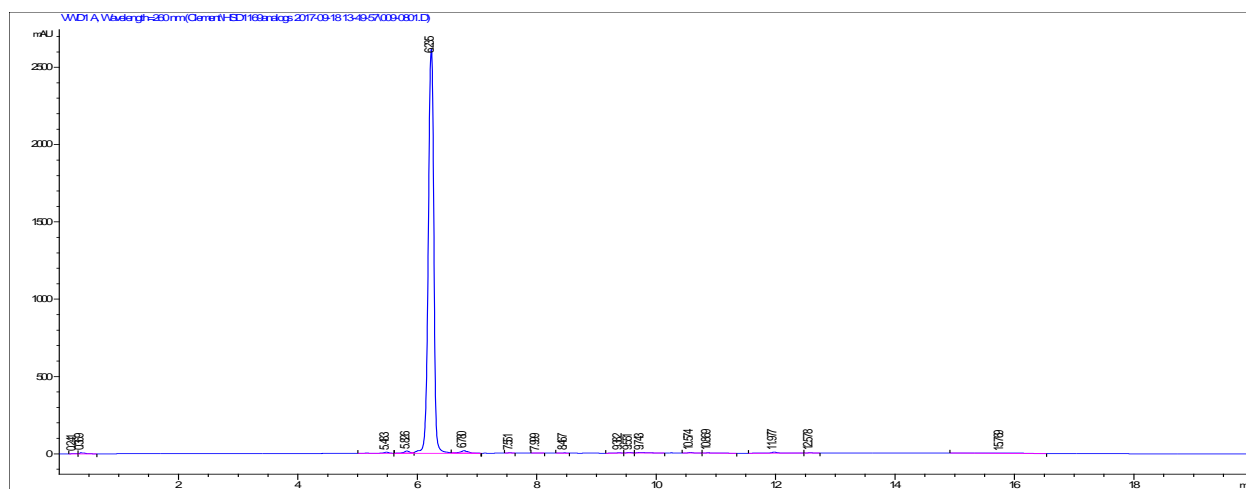

### HPLC of compound 8

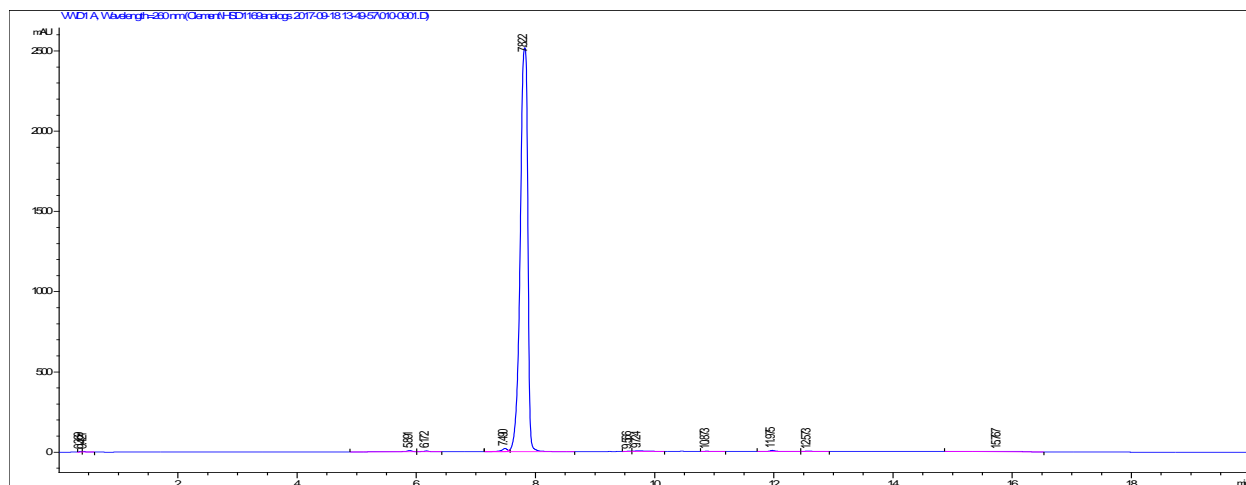

### HPLC of compound 9

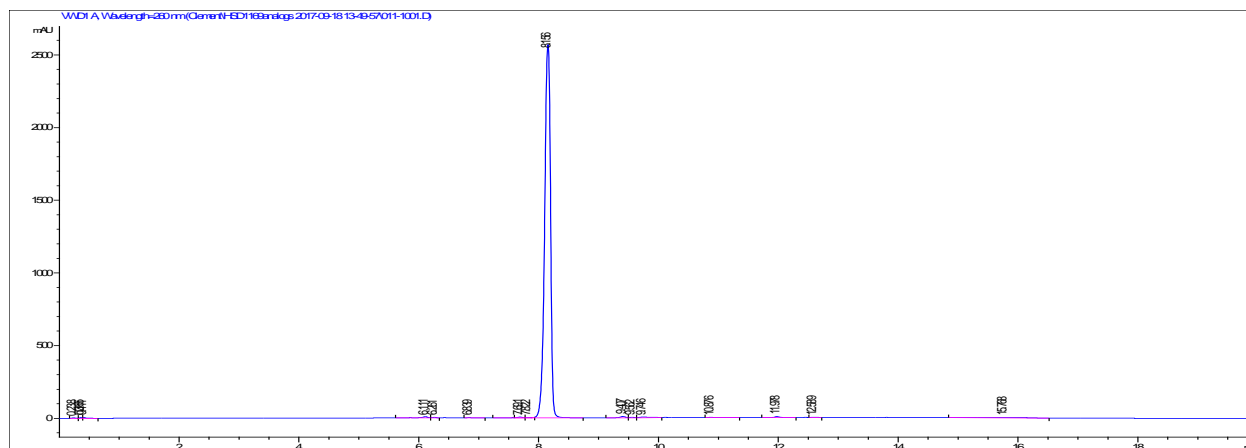

### HPLC of compound 10

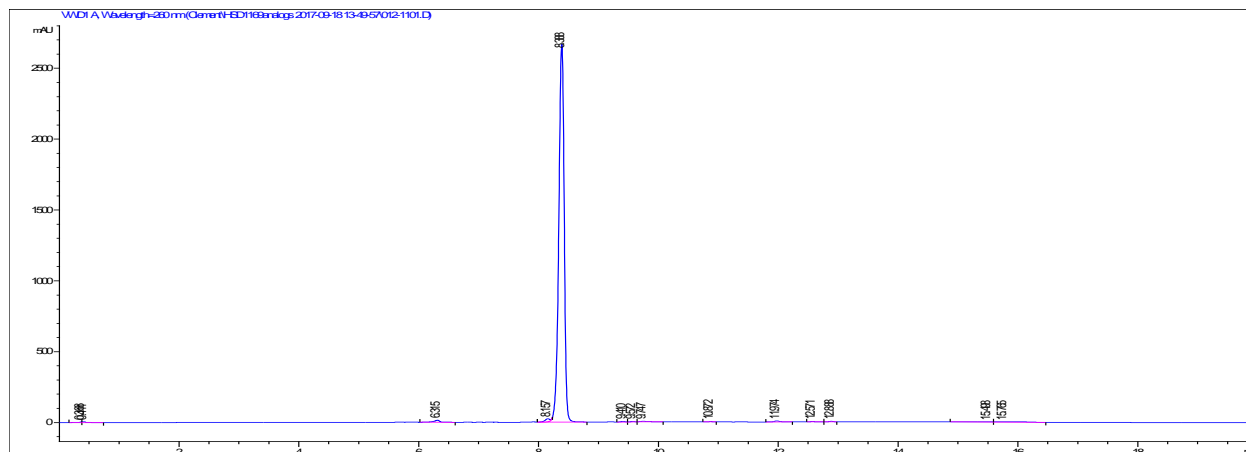

## HPLC of compound 11

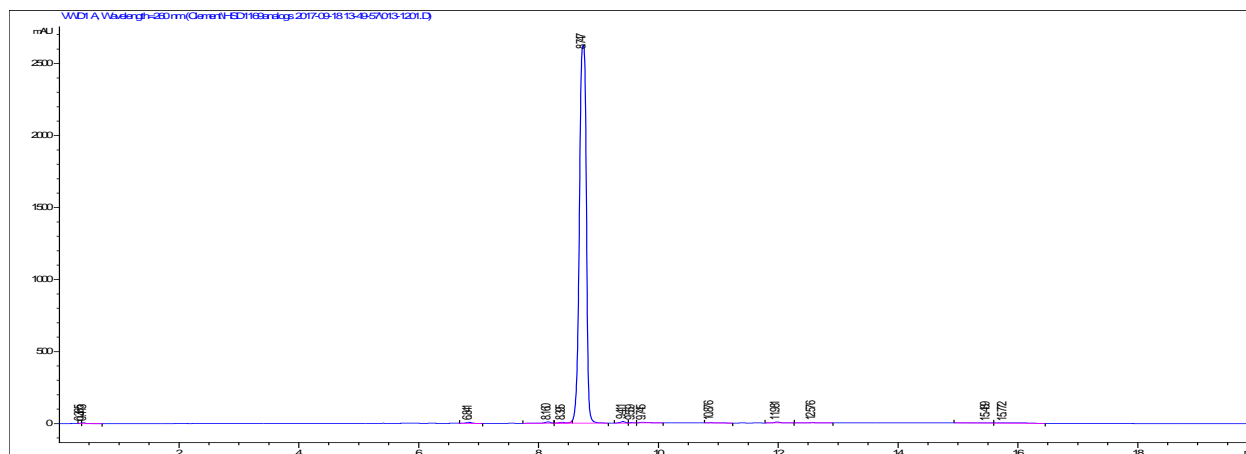

## HPLC of compound 12

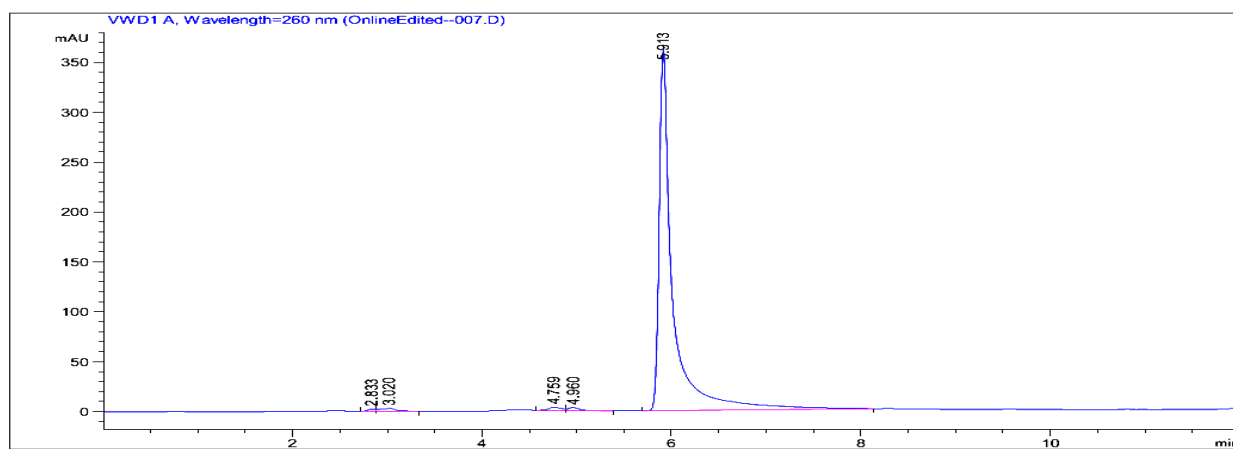

## HPLC of compound 13

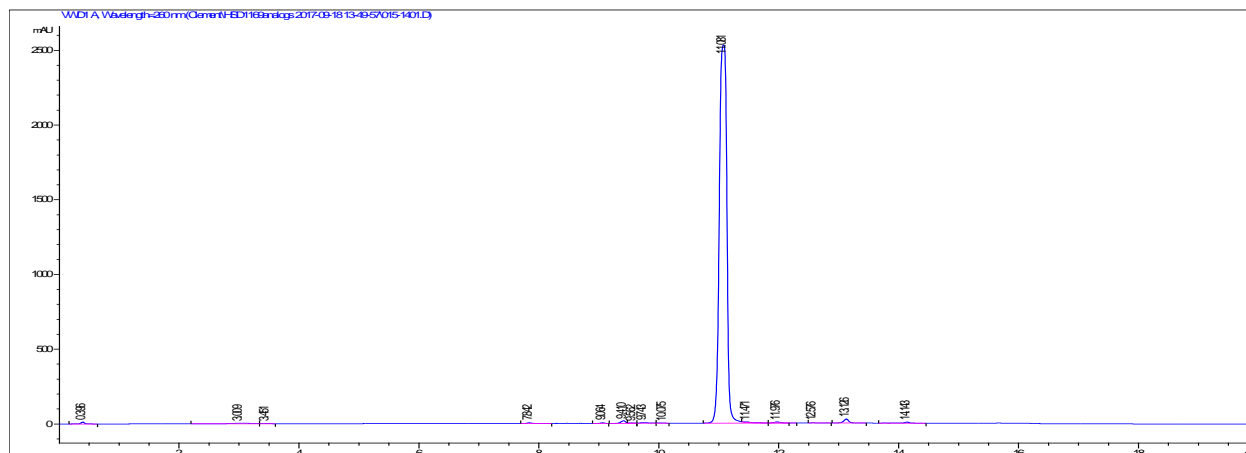

### HPLC of compound 14

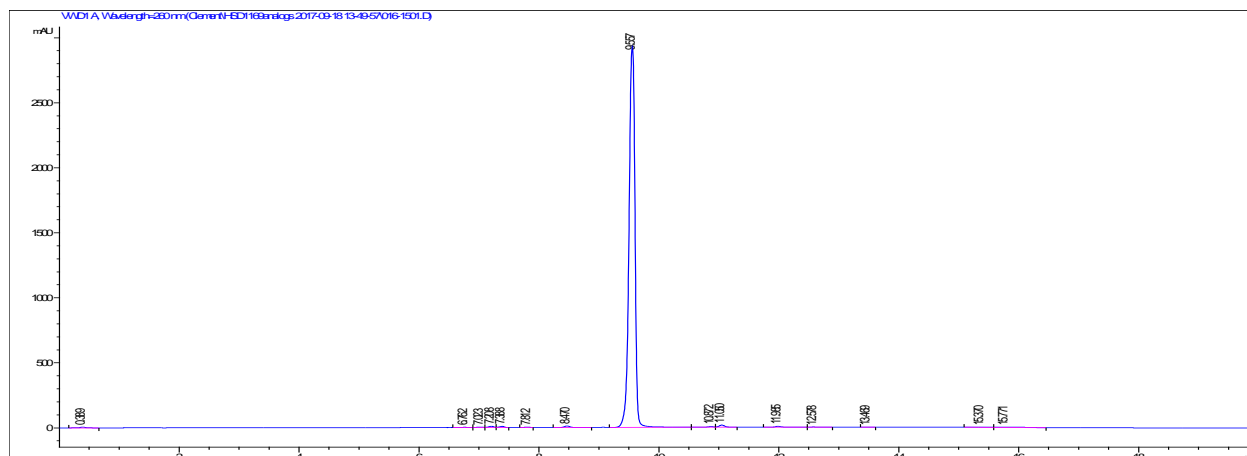

### HPLC of compound 15

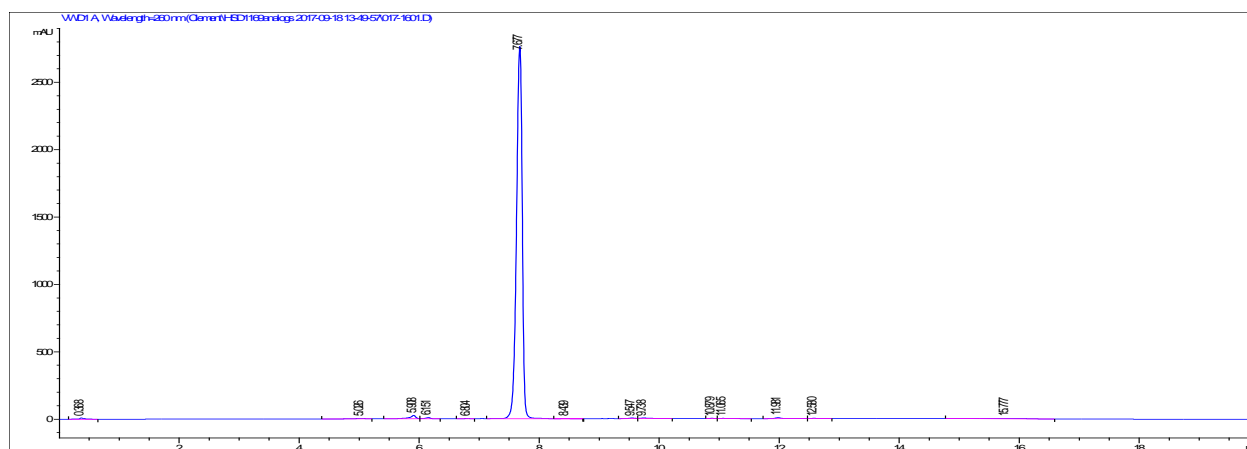

### HPLC of compound 16

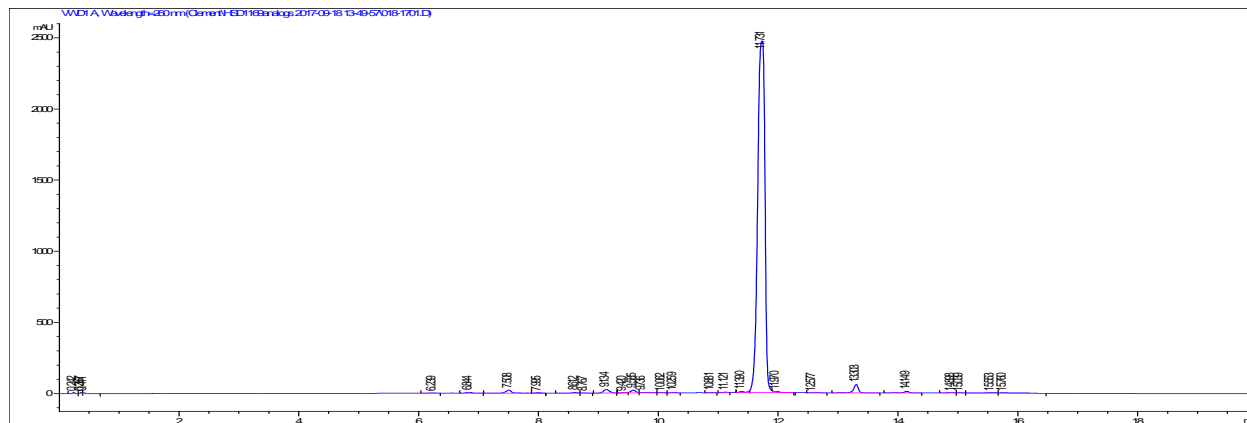

### HPLC of compound 17

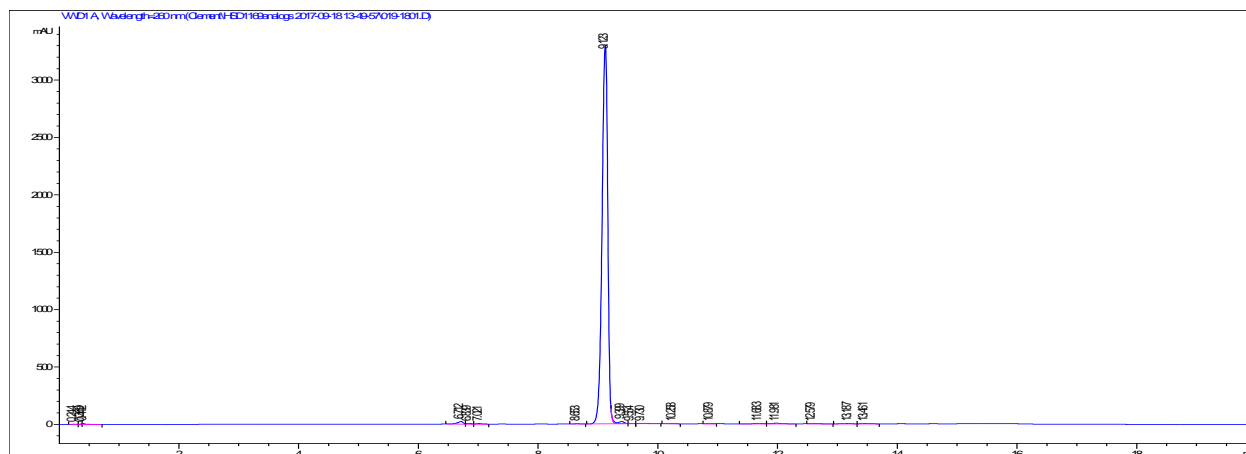

### HPLC of compound 18

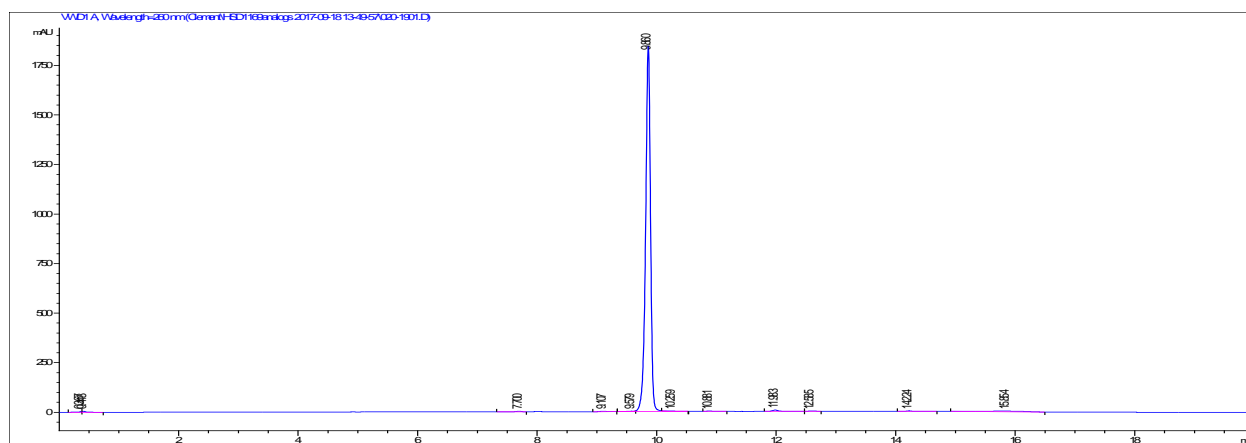

### HPLC of compound 19

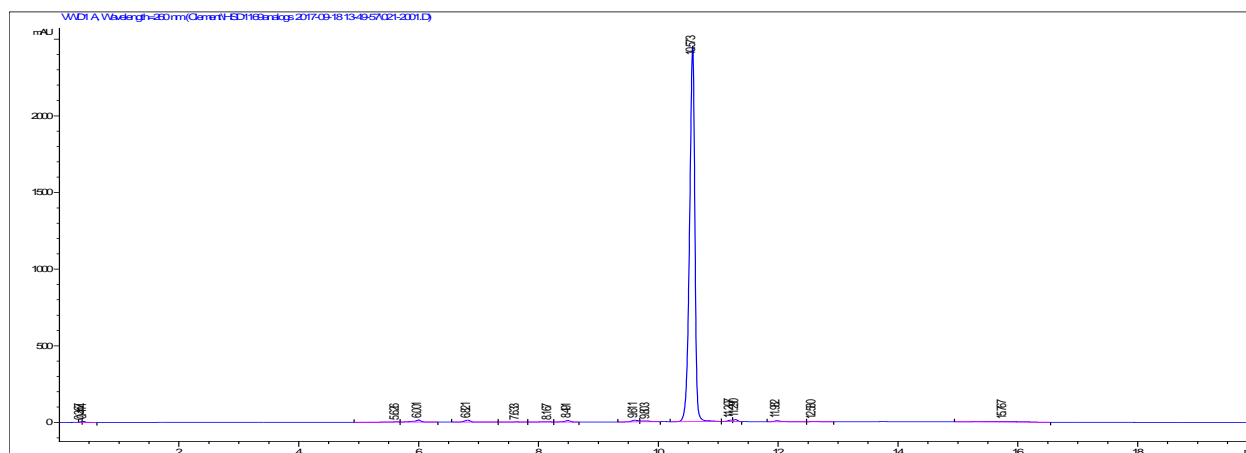



## HPLC of compound 20

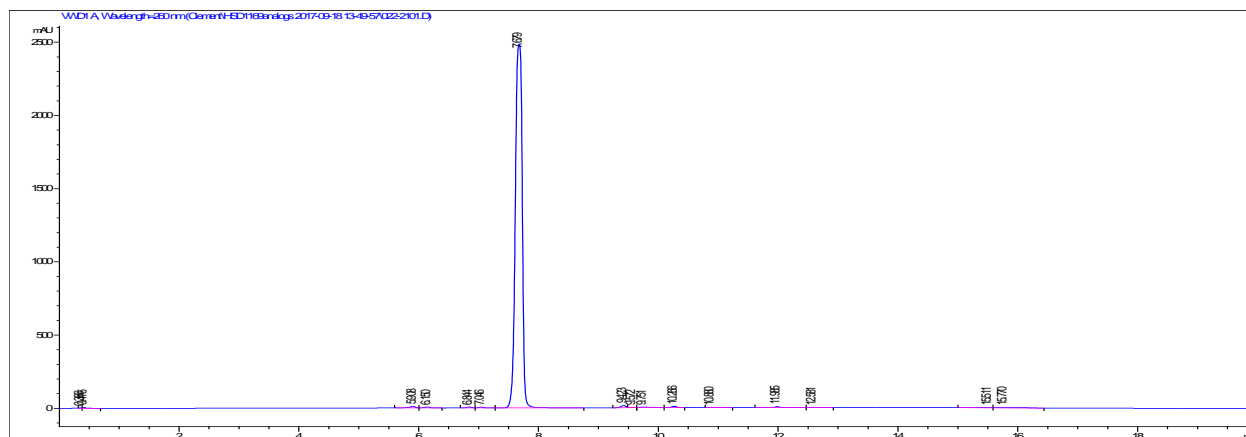

## HPLC of compound 21

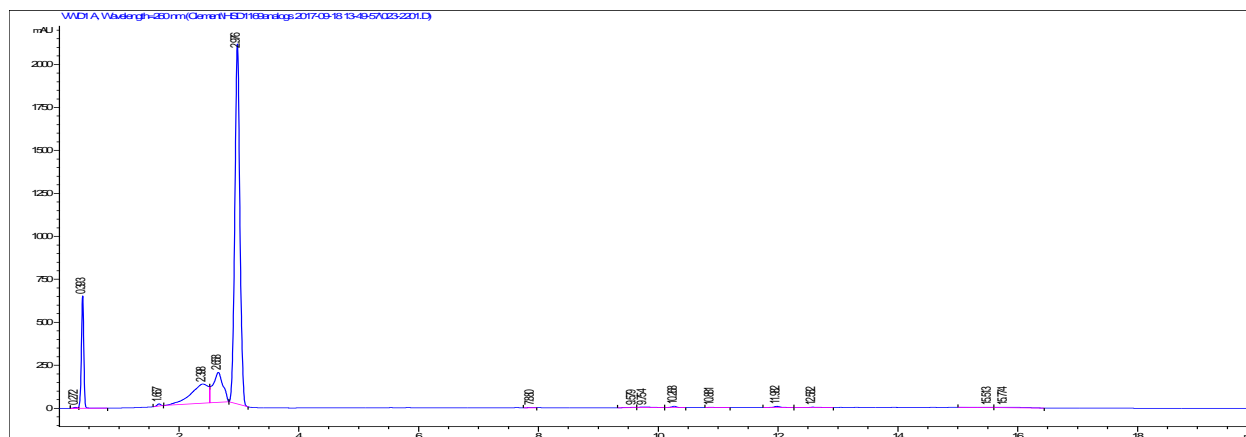

<sup>1</sup>H NMR of compound **1**

ND-02-Ace1169.1.fid

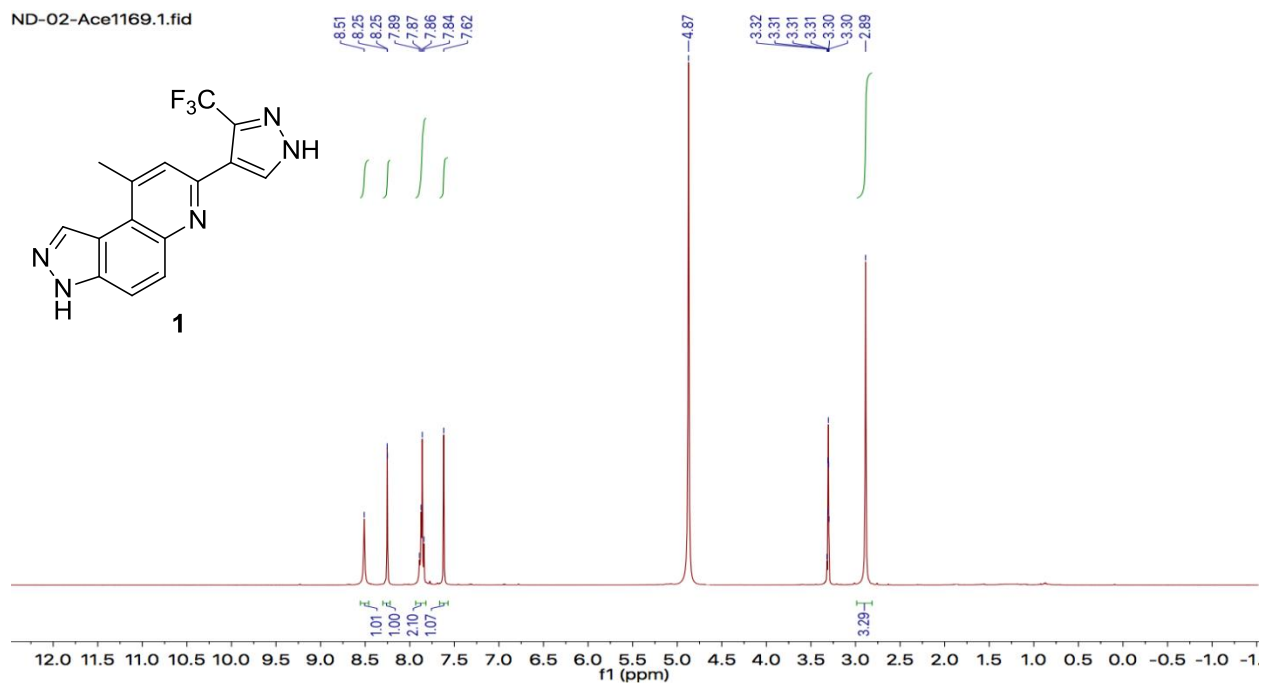

<sup>13</sup>C NMR of compound **1**

ND-02-ac1169.2.fid

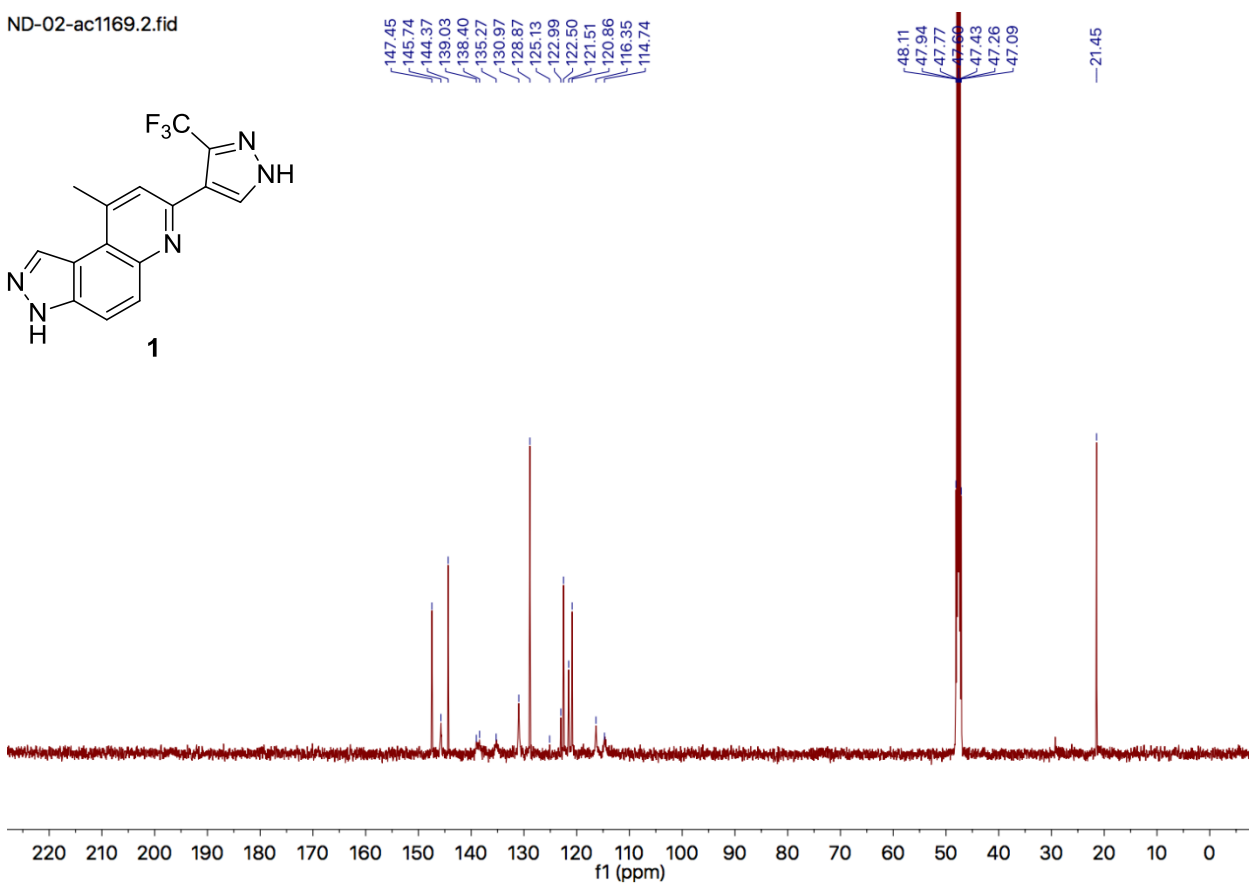

<sup>1</sup>H NMR of compound 2

ND-02-12290.1.fid

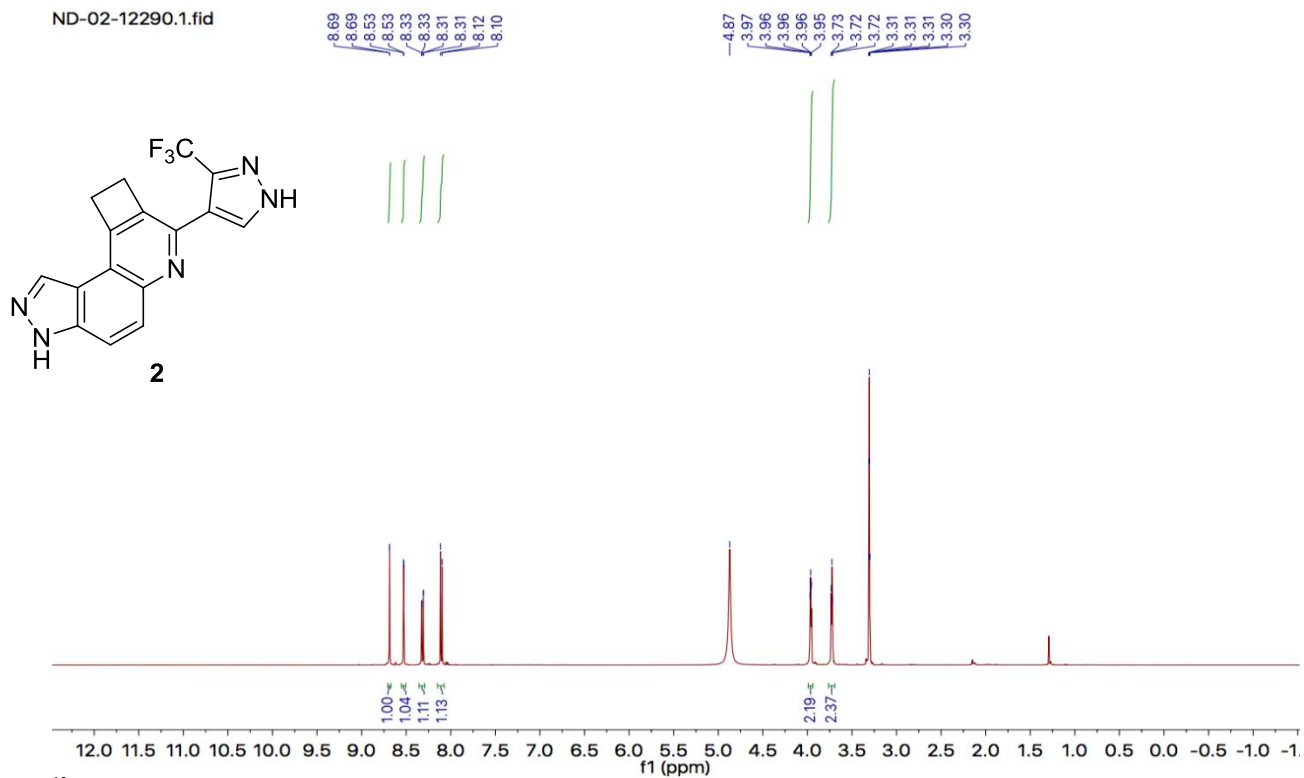

<sup>13</sup>C NMR of compound 2

ND-02-12290.2.fid

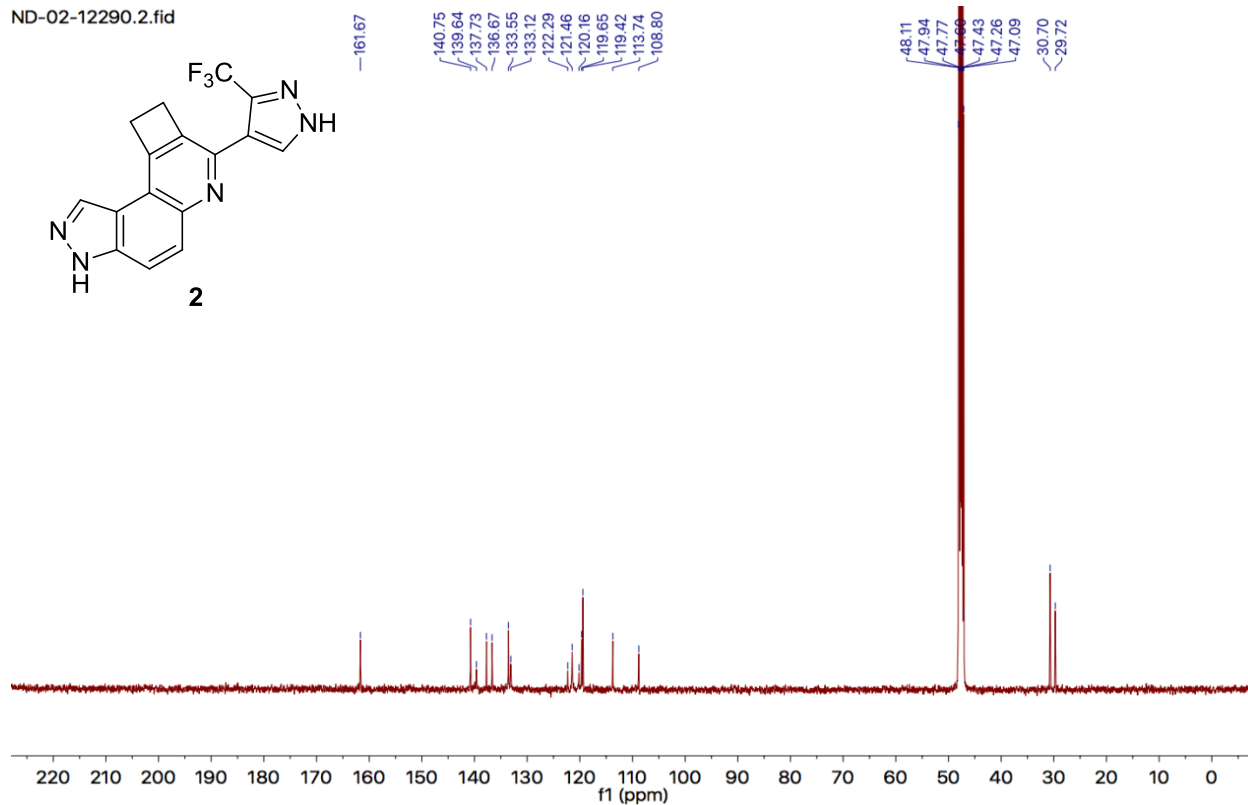

<sup>1</sup>H NMR of compound 3

ND-02-1169 pan.1.fid

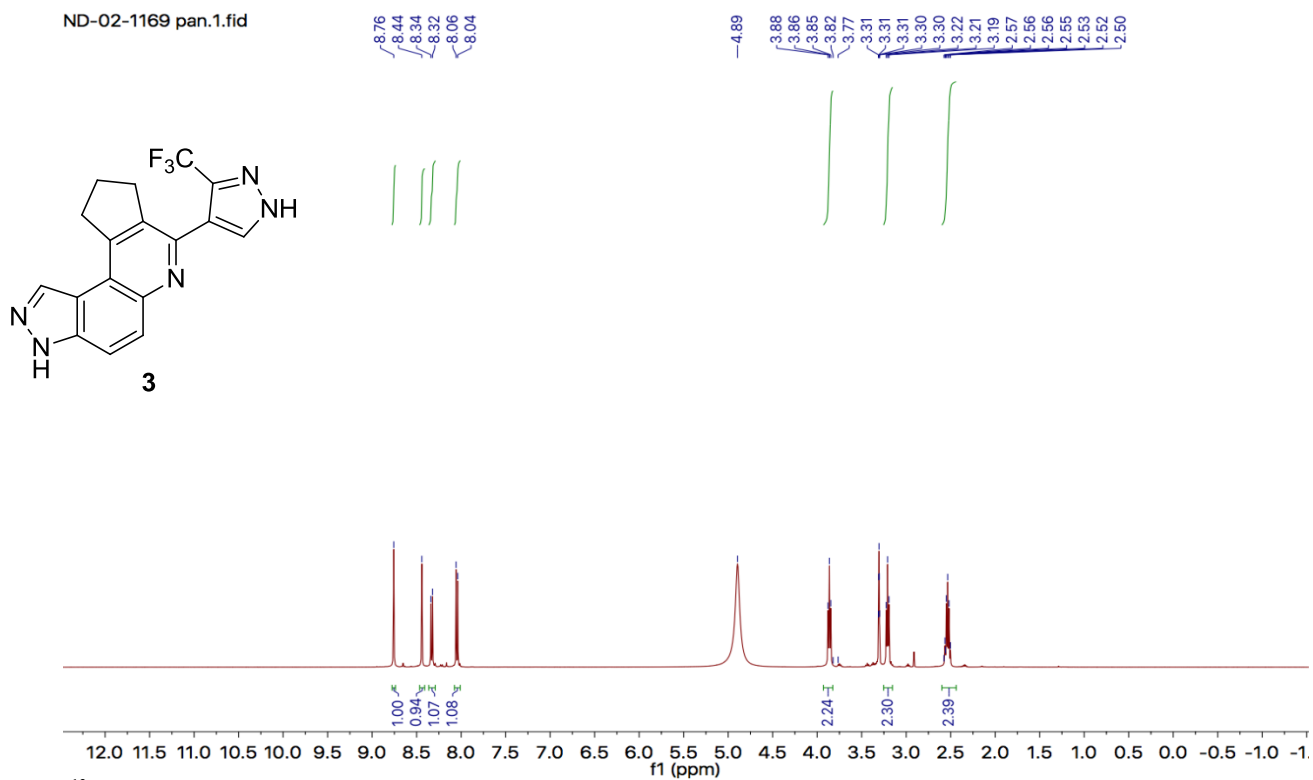

<sup>13</sup>C NMR of compound 3

ND-02-1169 pan.2.fid

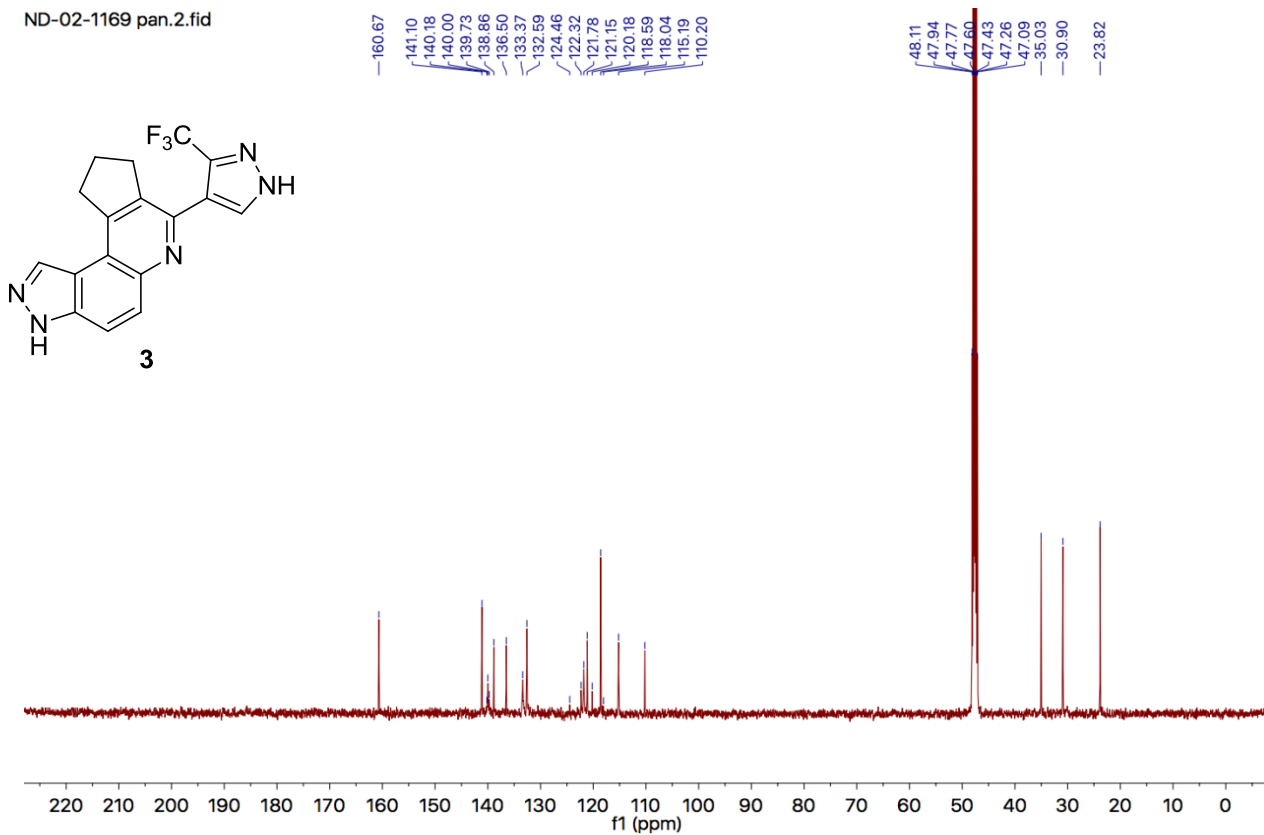

<sup>1</sup>H NMR of compound 4

ND-02-1169h.1.fid

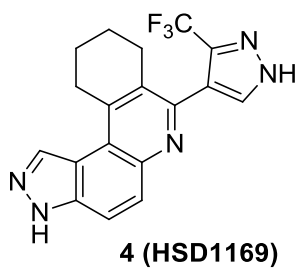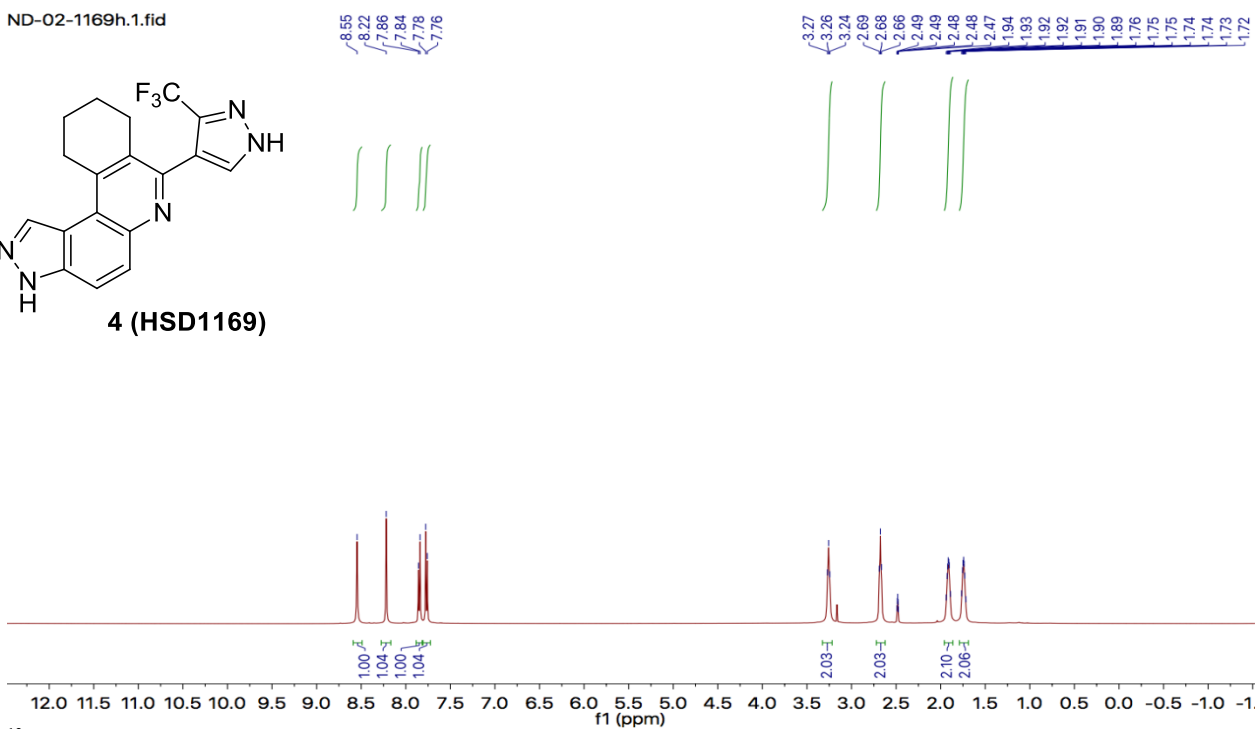

<sup>13</sup>C NMR of compound 4

ND-02-1169h.2.fid

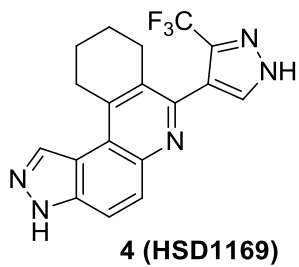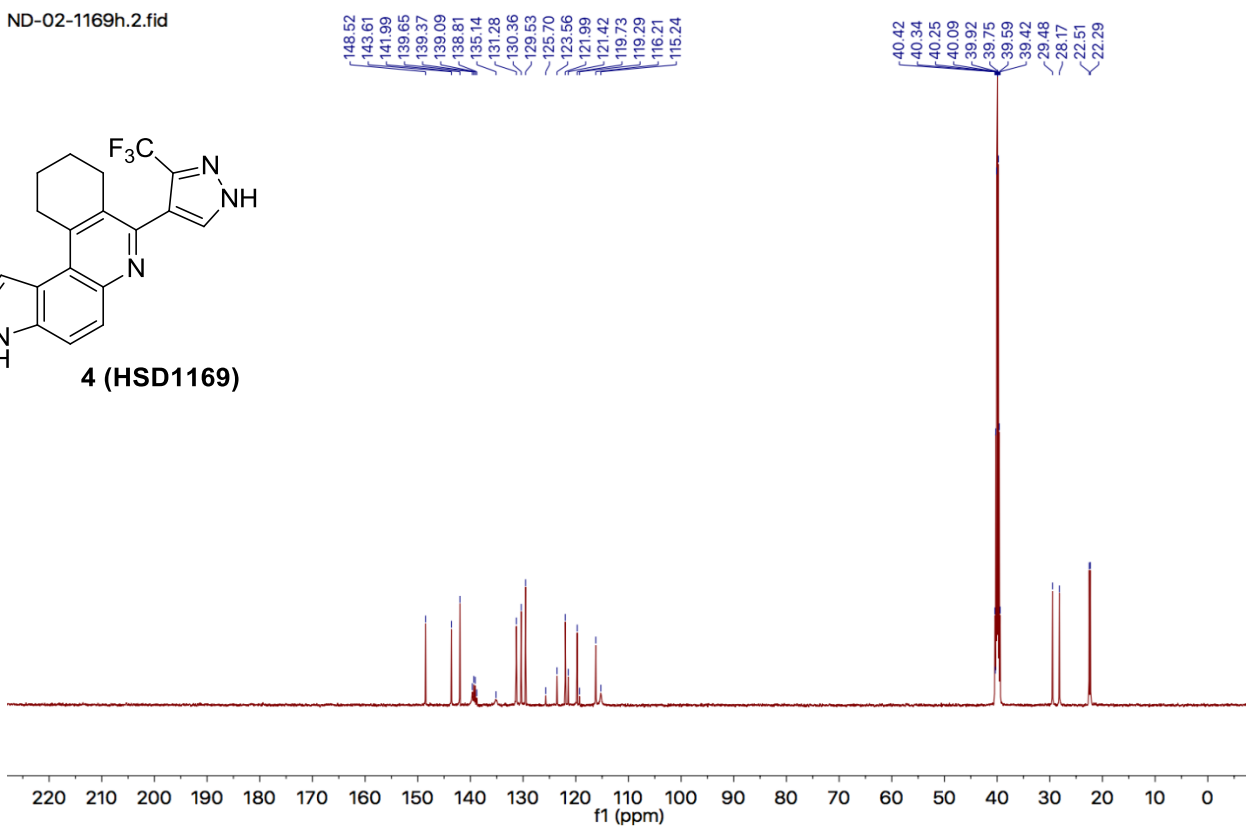

<sup>1</sup>H NMR of compound 5

ND-02-1169hep.1.fid

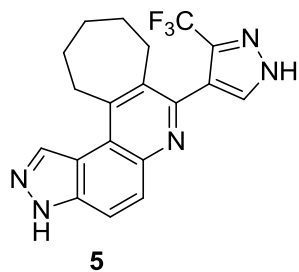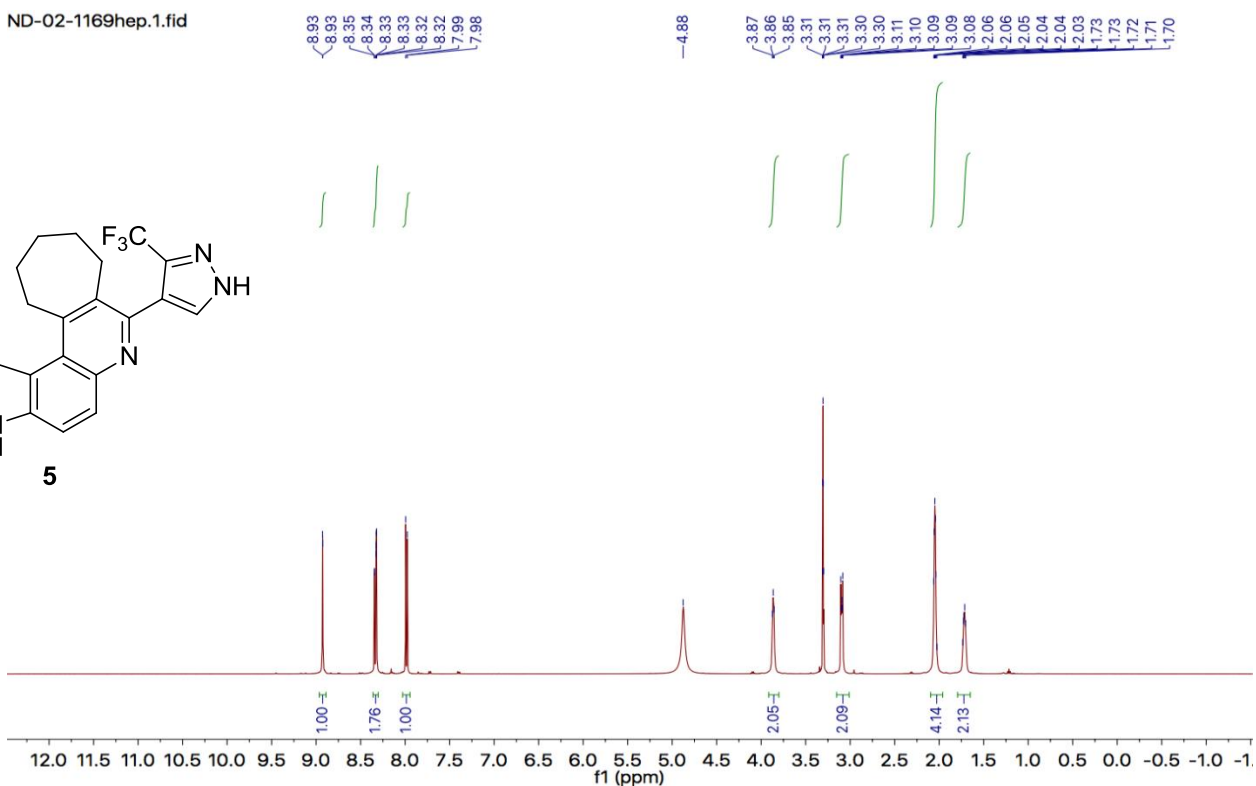

<sup>13</sup>C NMR of compound 5

ND-02-1169hep.2.fid

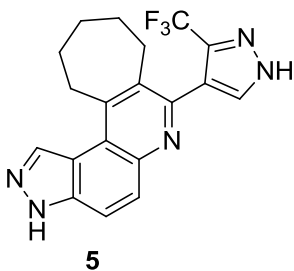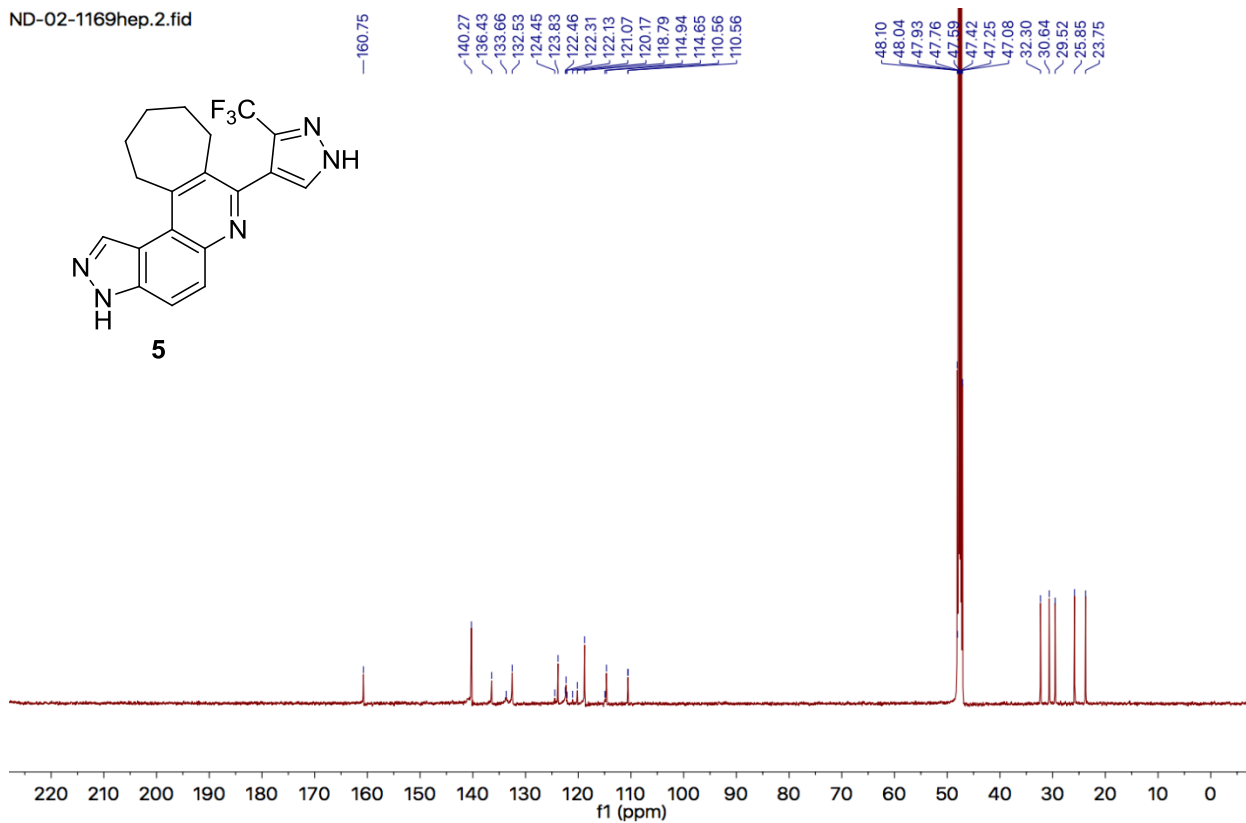

<sup>1</sup>H NMR of compound 6

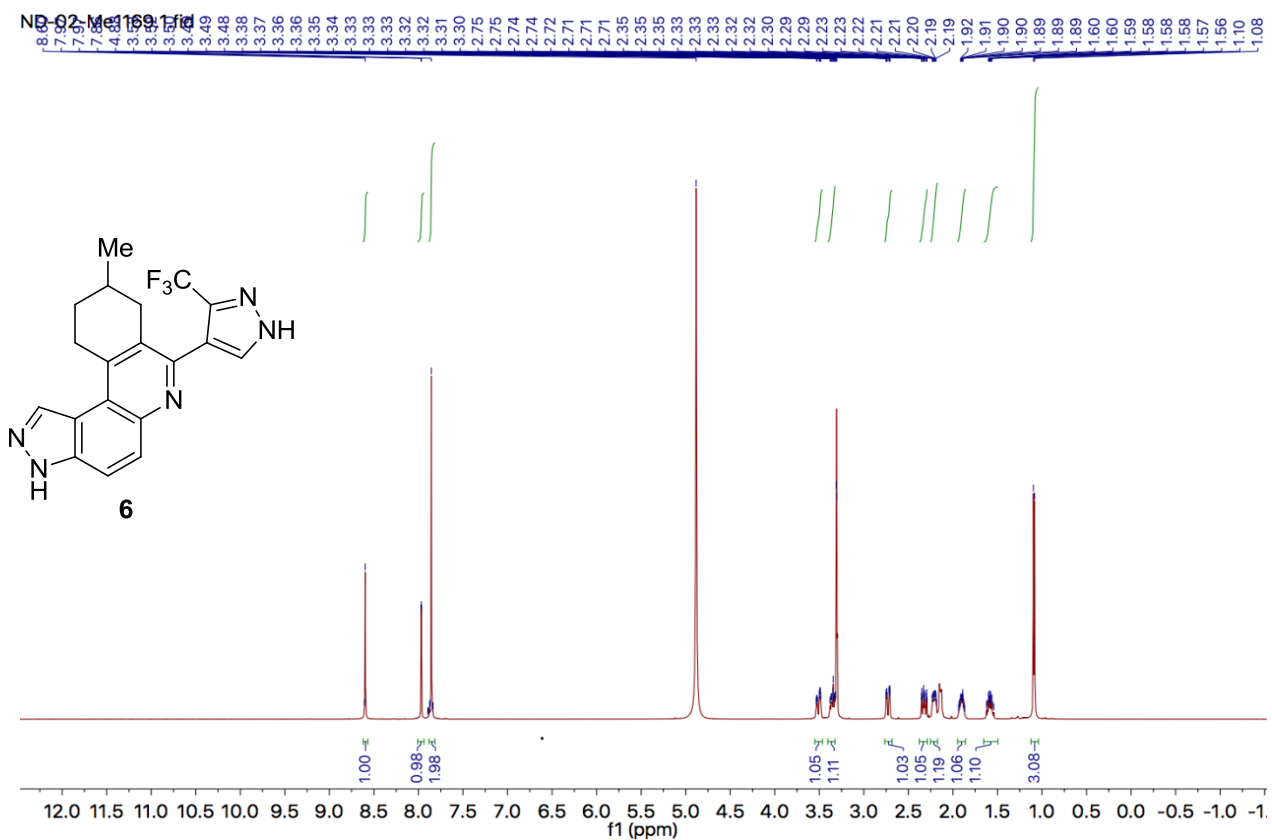

<sup>13</sup>C NMR of compound 6

ND-02-1169me.2.fid

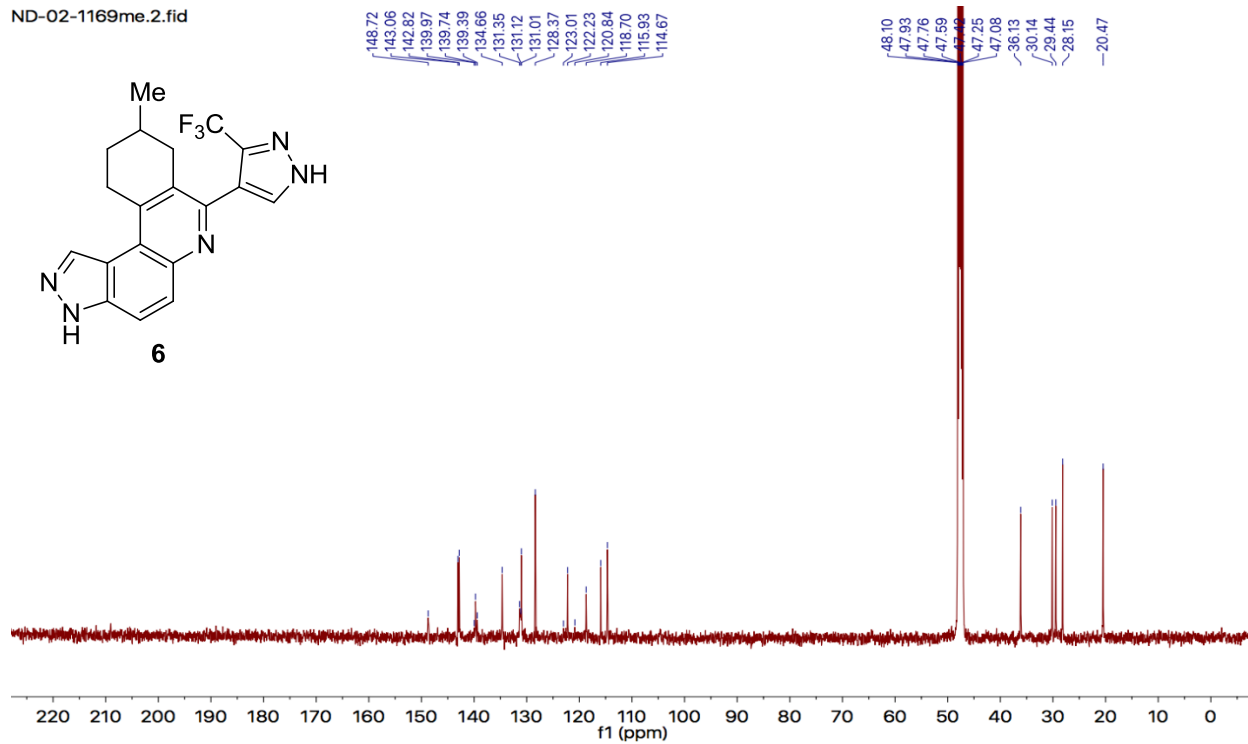

<sup>1</sup>H NMR of compound 7

ND-02-1169nh2.1.fid

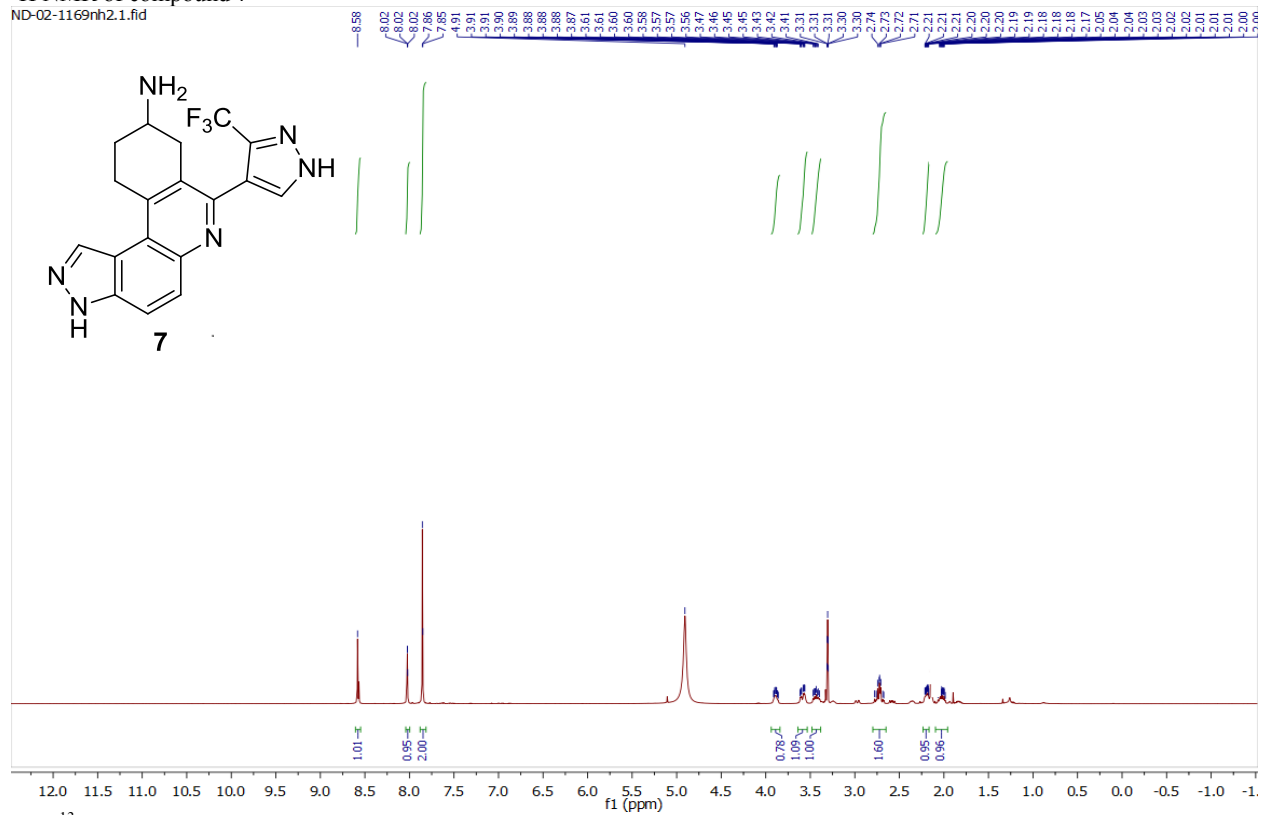

<sup>13</sup>C NMR of compound 7

ND-02-1304r.2.fid

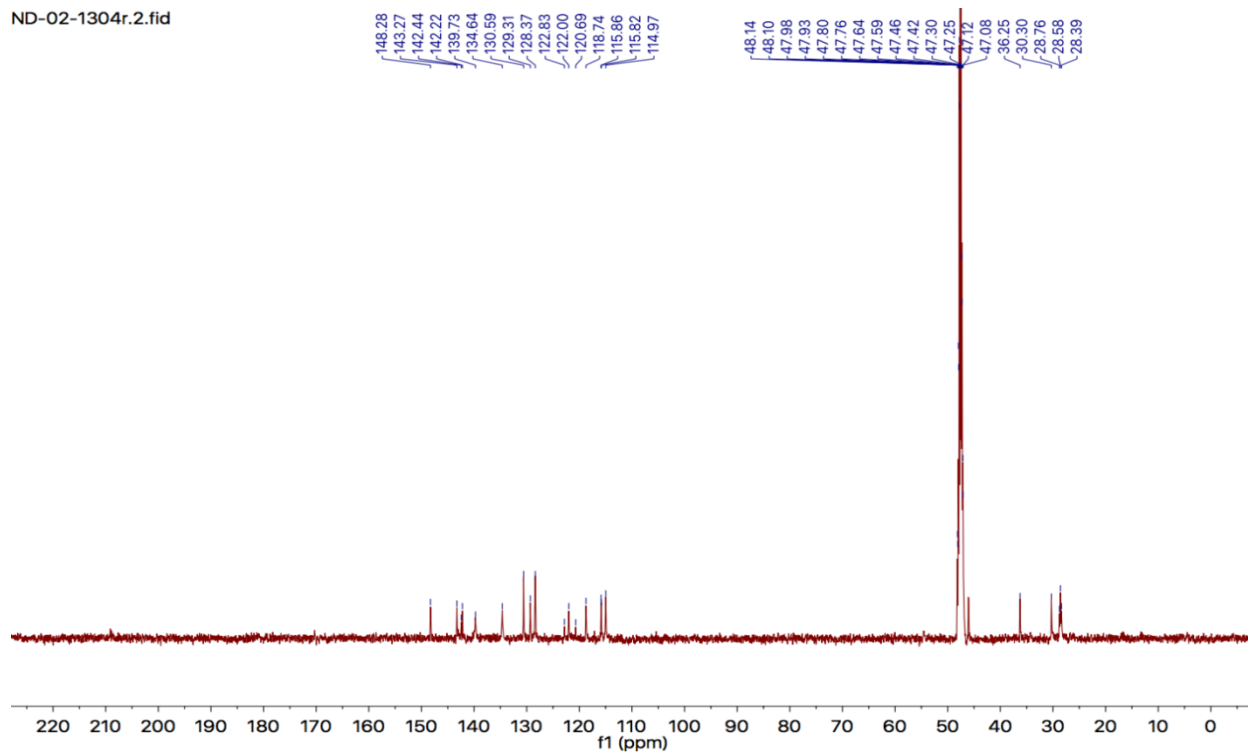



<sup>1</sup>H NMR of compound **8**

ND-02-1077r.1.fid

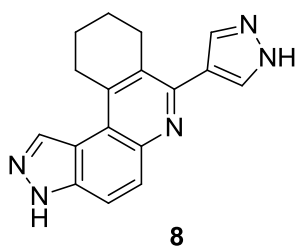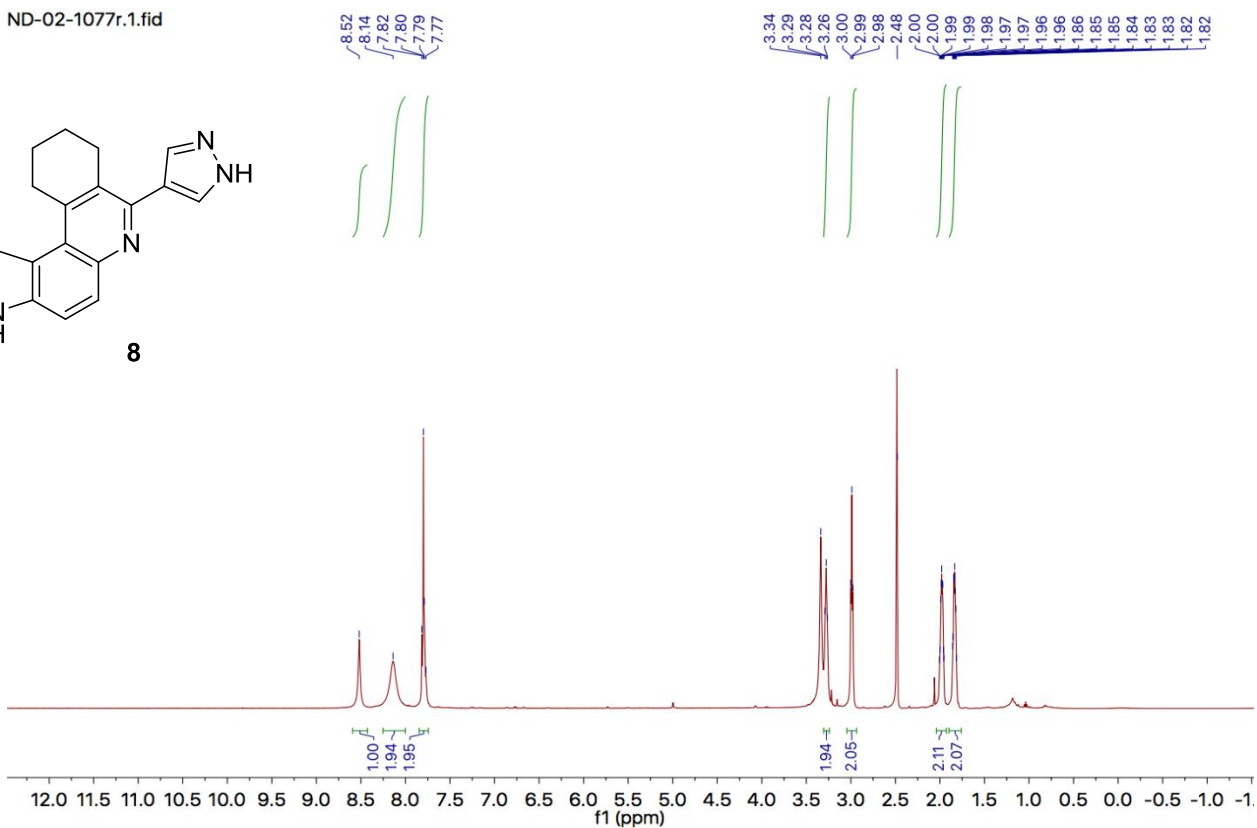

<sup>13</sup>C NMR of compound **8**

ND-02-1077r.2.fid

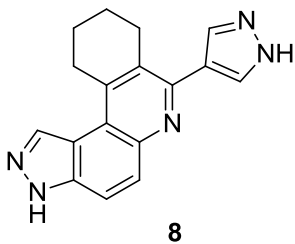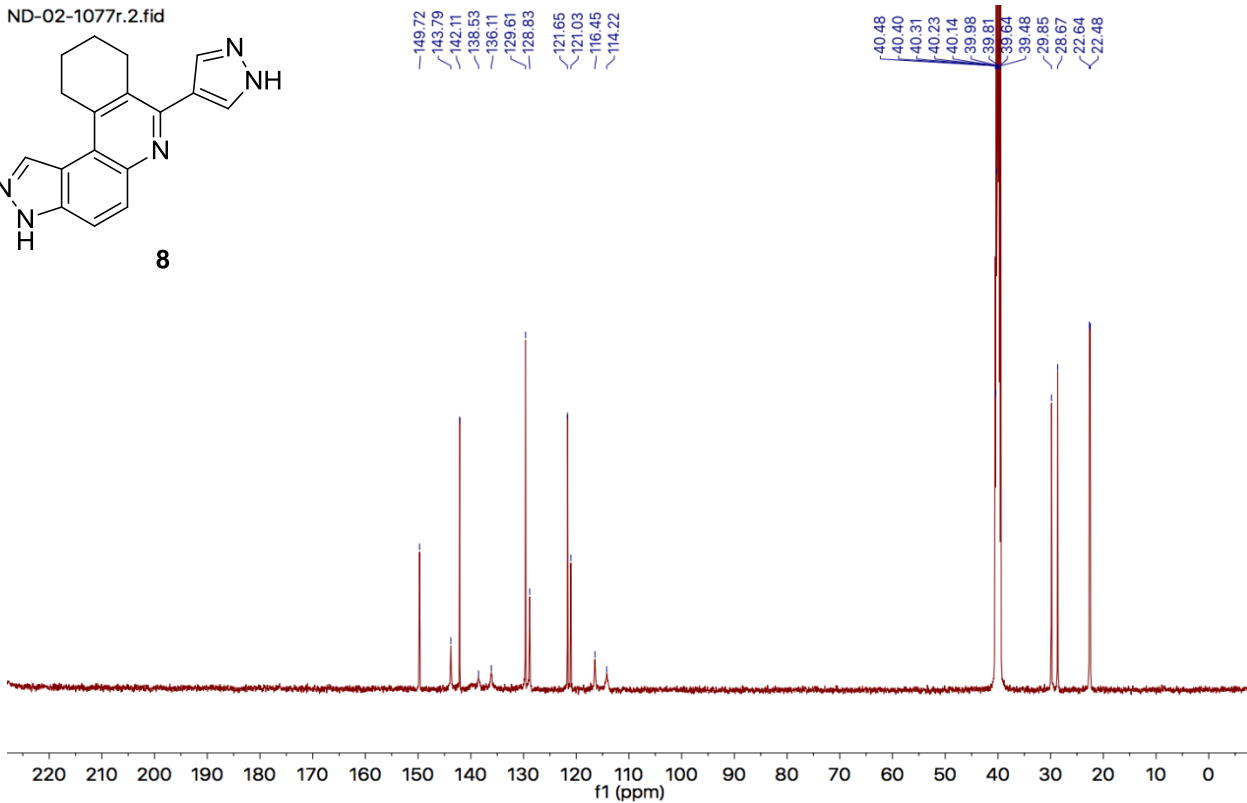

<sup>1</sup>H NMR of compound 9

ND-02-1236r.1.fid

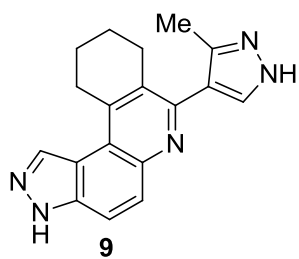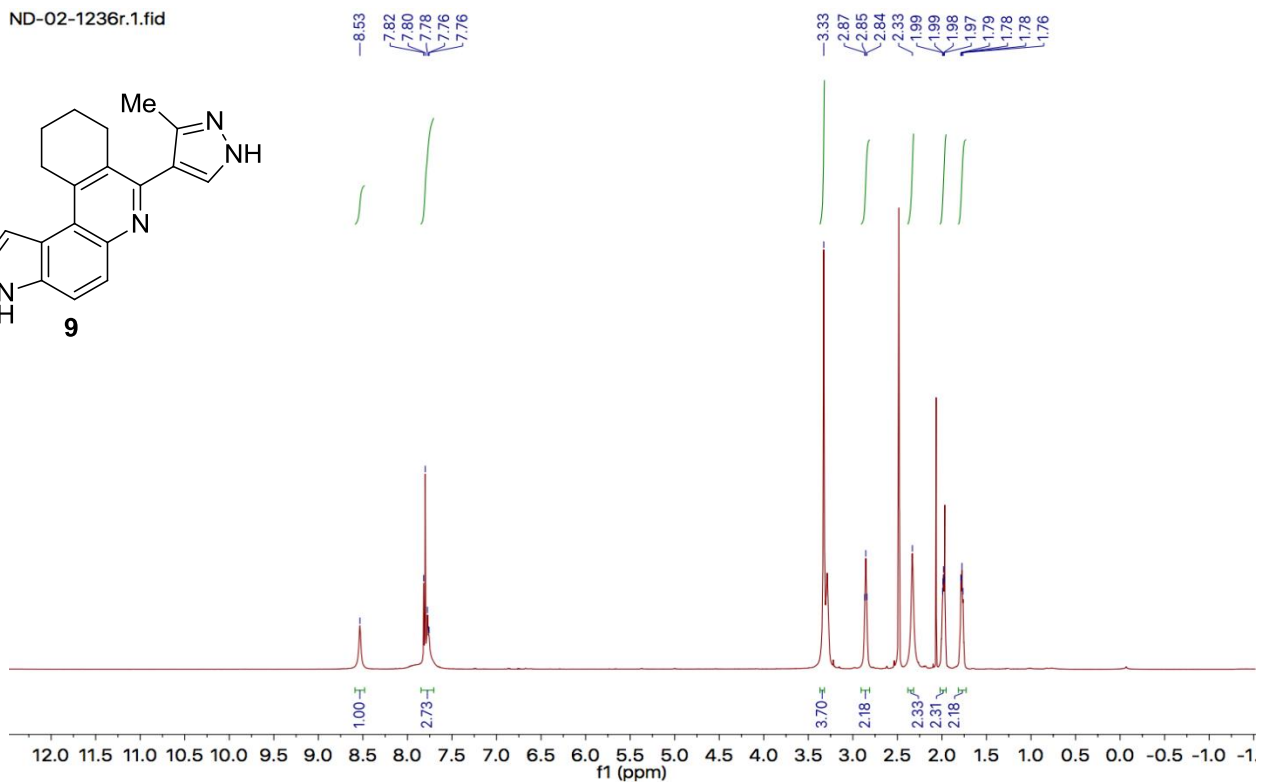

<sup>13</sup>C NMR of compound 9

ND-02-1236r.2.fid

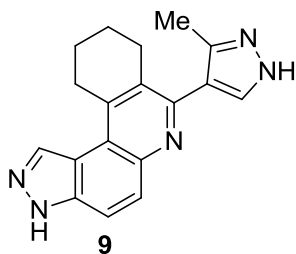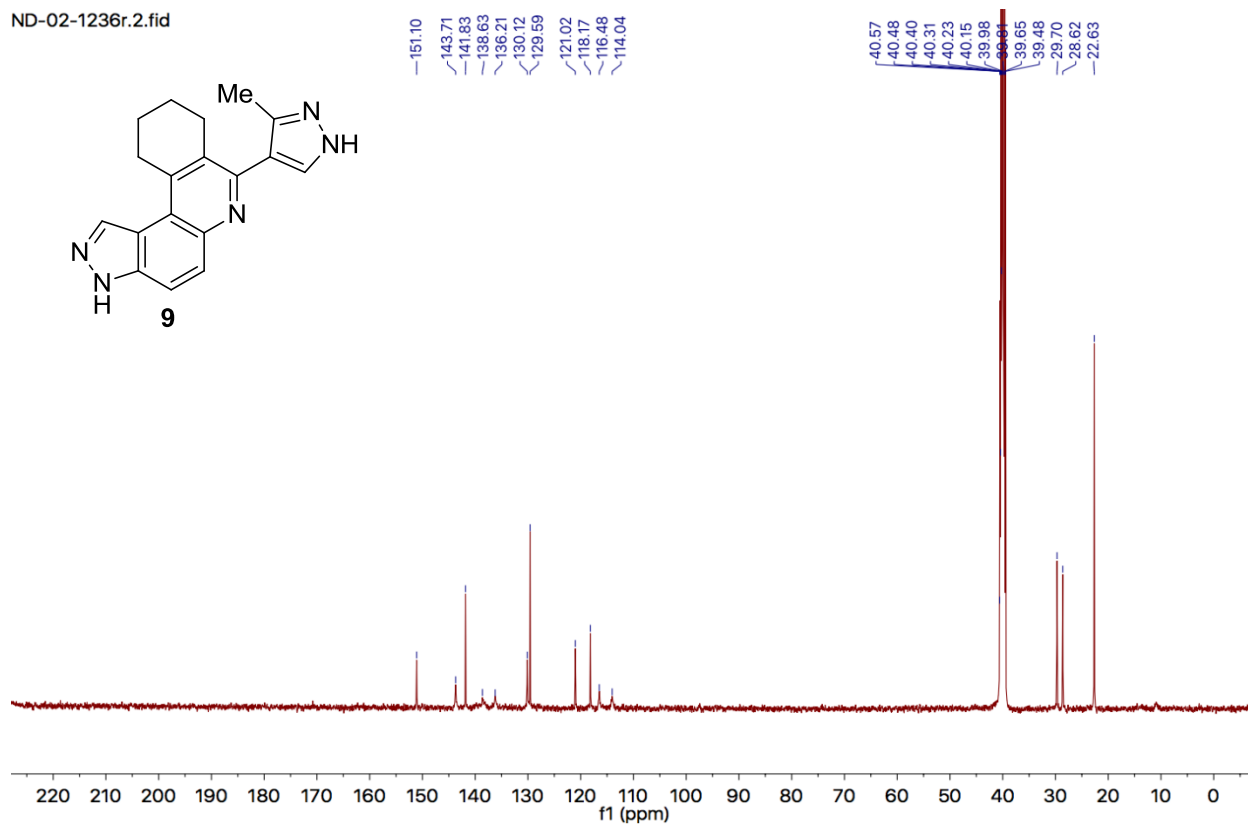

<sup>1</sup>H NMR of compound **10**

ND-02-1262r.1.fid

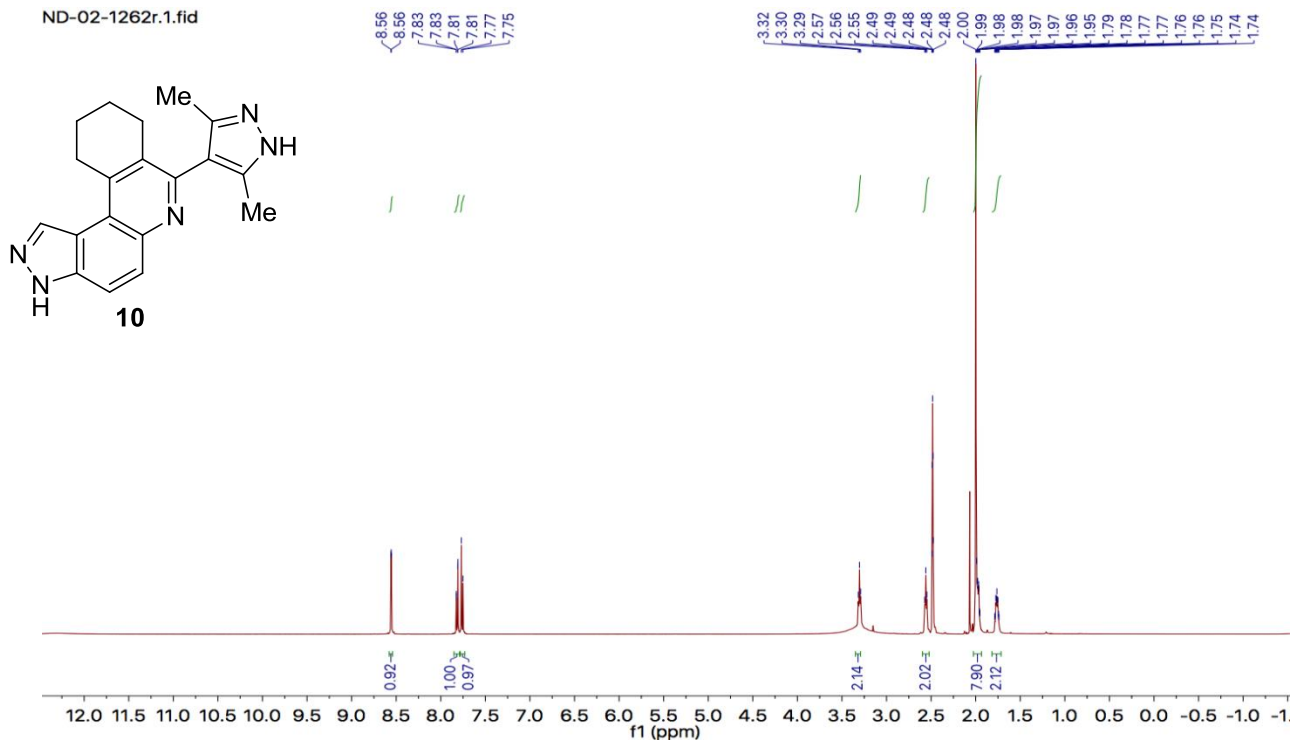

<sup>13</sup>C NMR of compound **10**

ND-02-1262r.2.fid

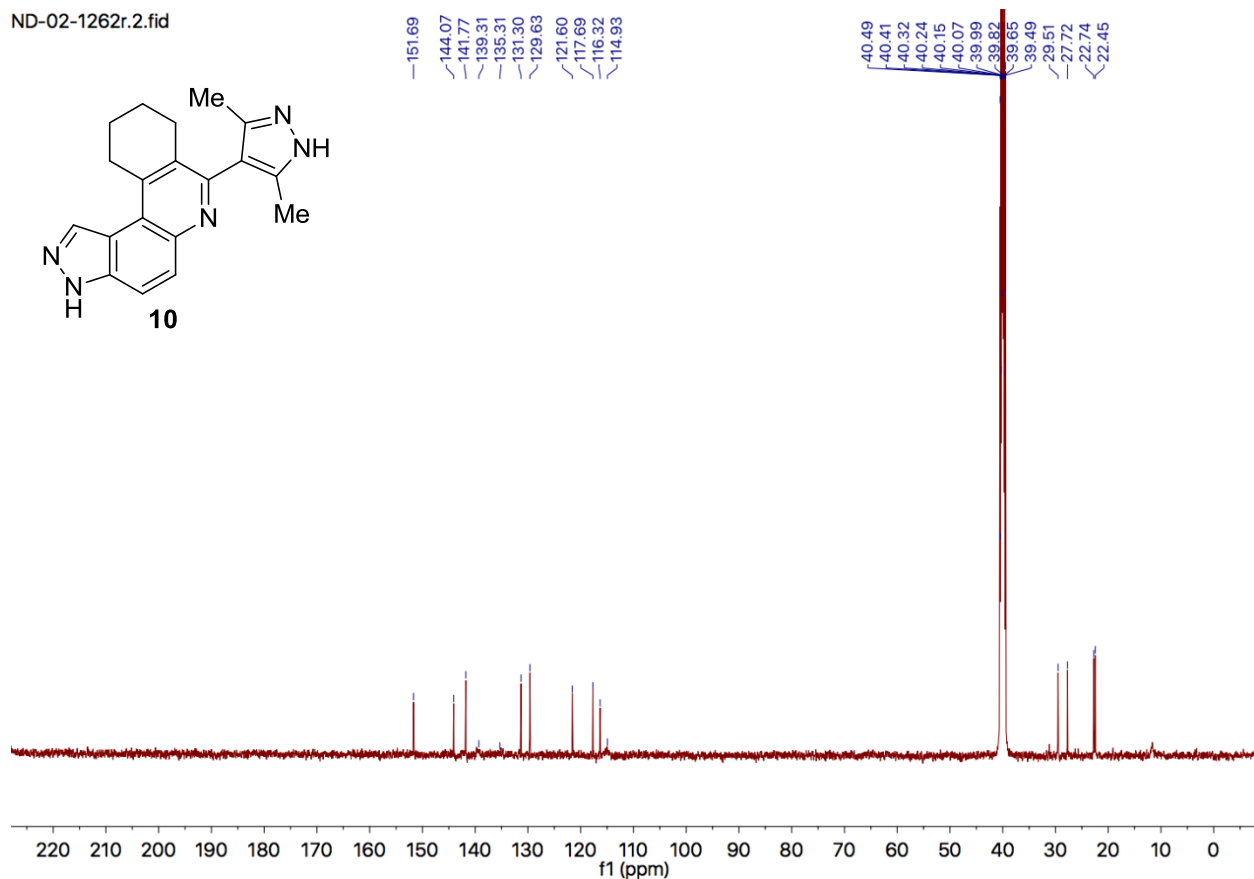

<sup>1</sup>H NMR of compound **11**

ND-02-1,3dimepych.1.fid

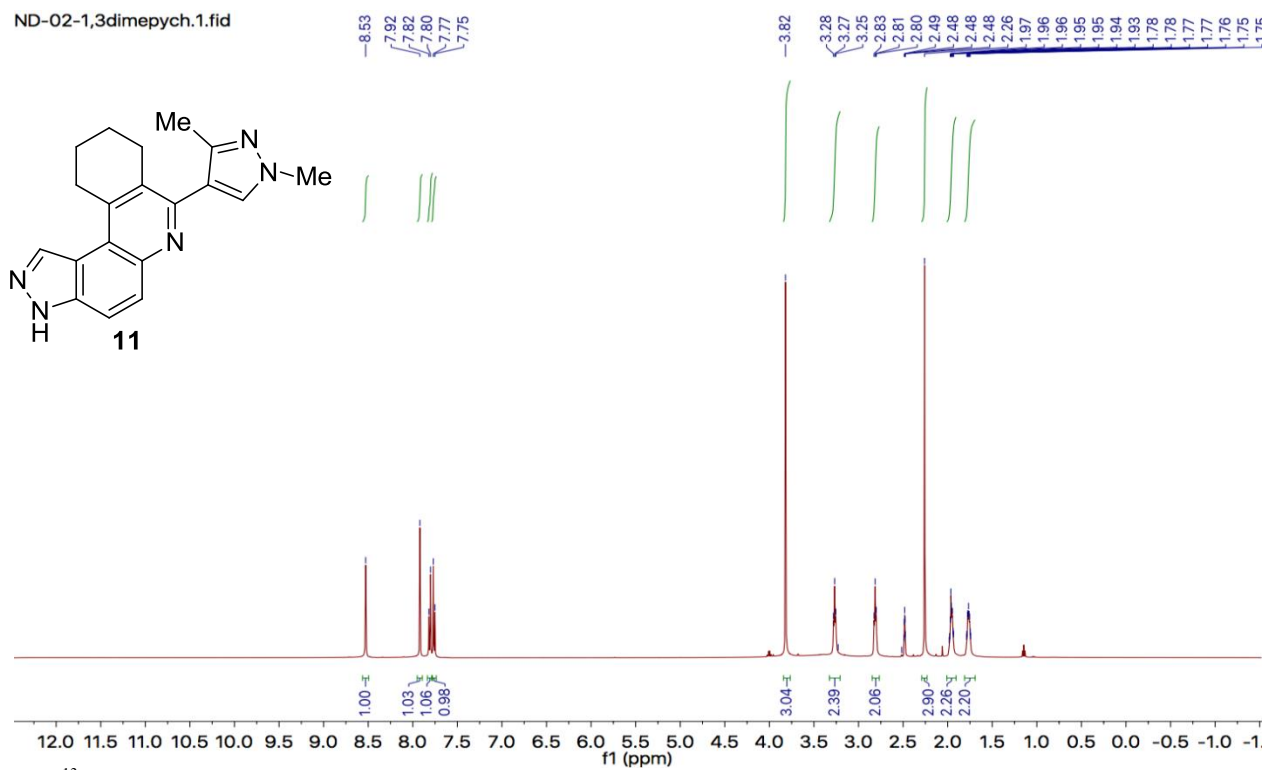

<sup>13</sup>C NMR of compound **11**

ND-02-1,3dimepych.2.fid

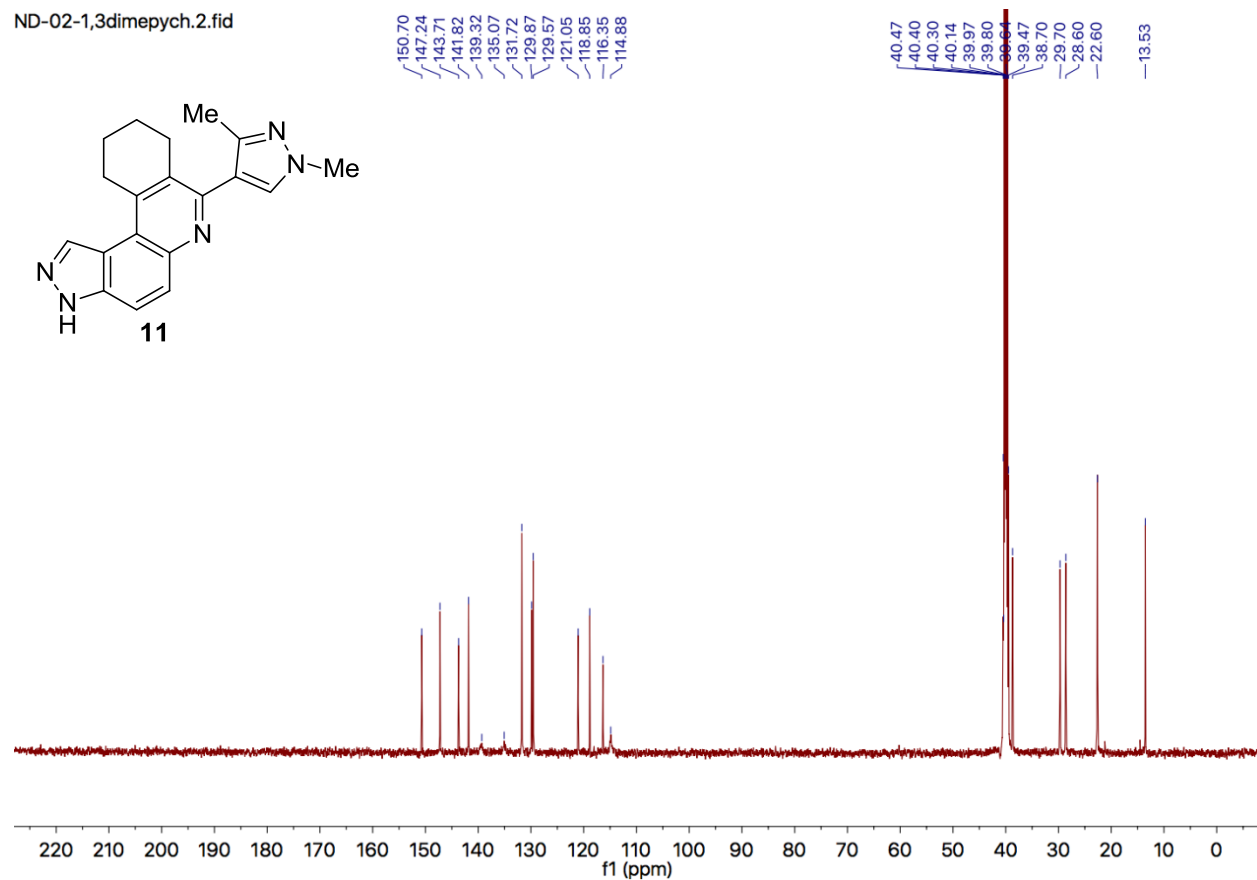

<sup>1</sup>H NMR of compound 12

ND-02-1292.1.fid

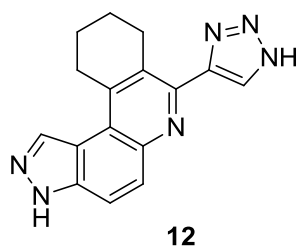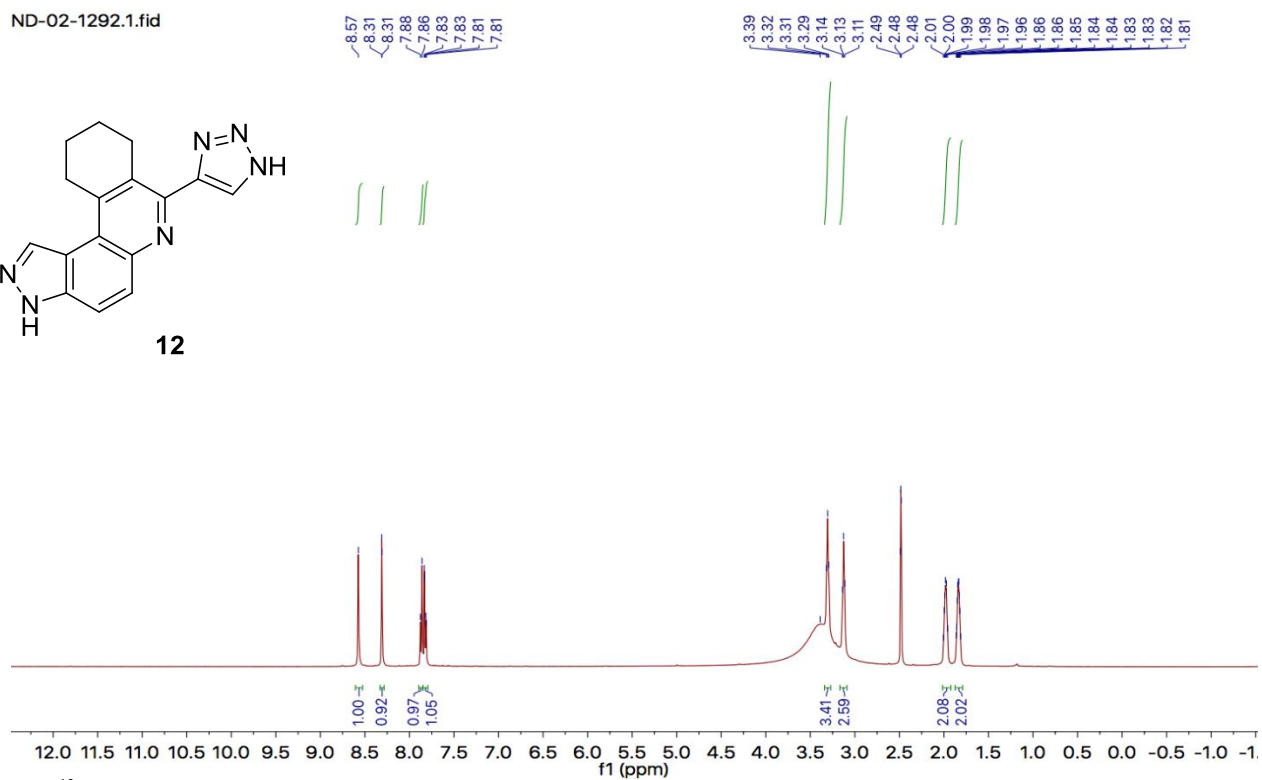

<sup>13</sup>C NMR of compound 12

ND-02-1292.2.fid

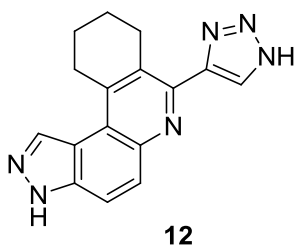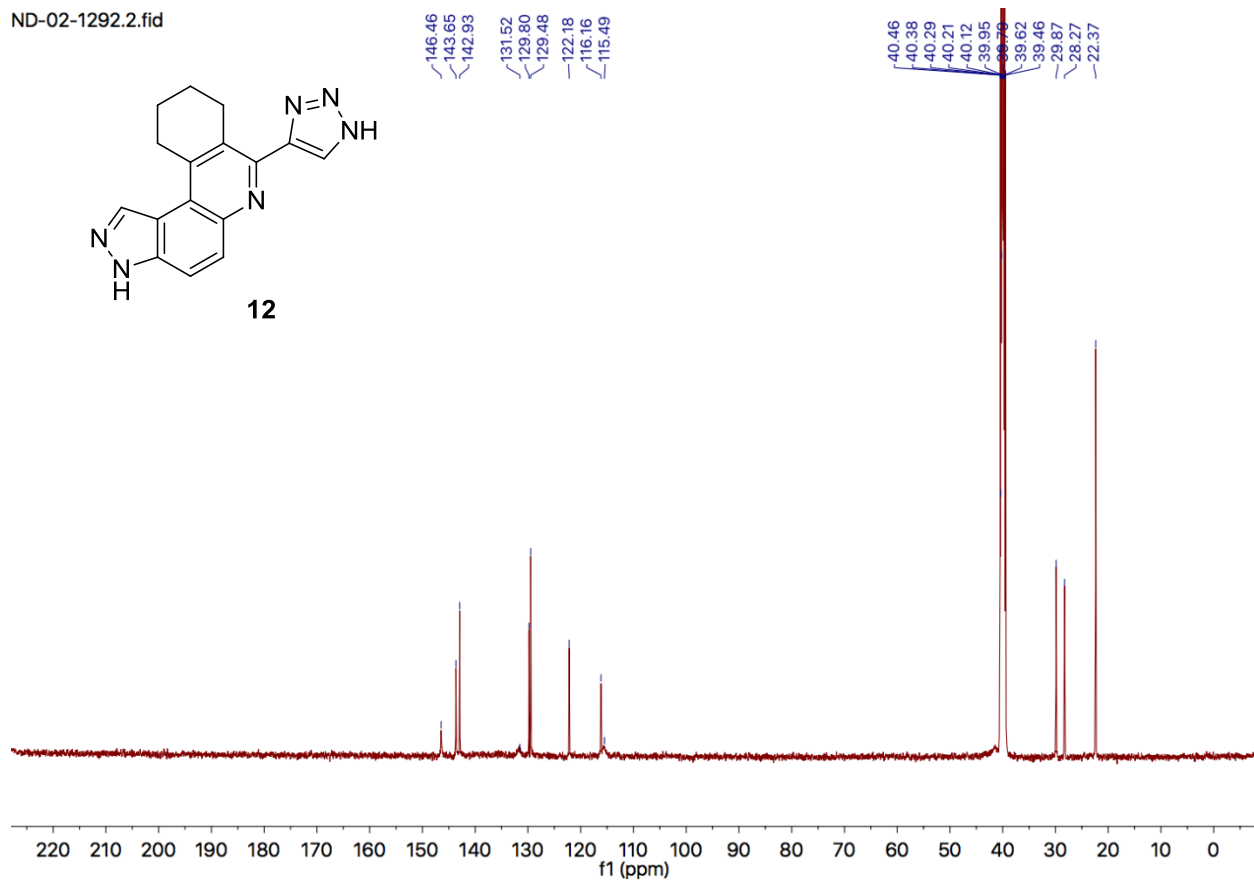

<sup>1</sup>H NMR of compound **13**

ND-02-1240r.1.fid

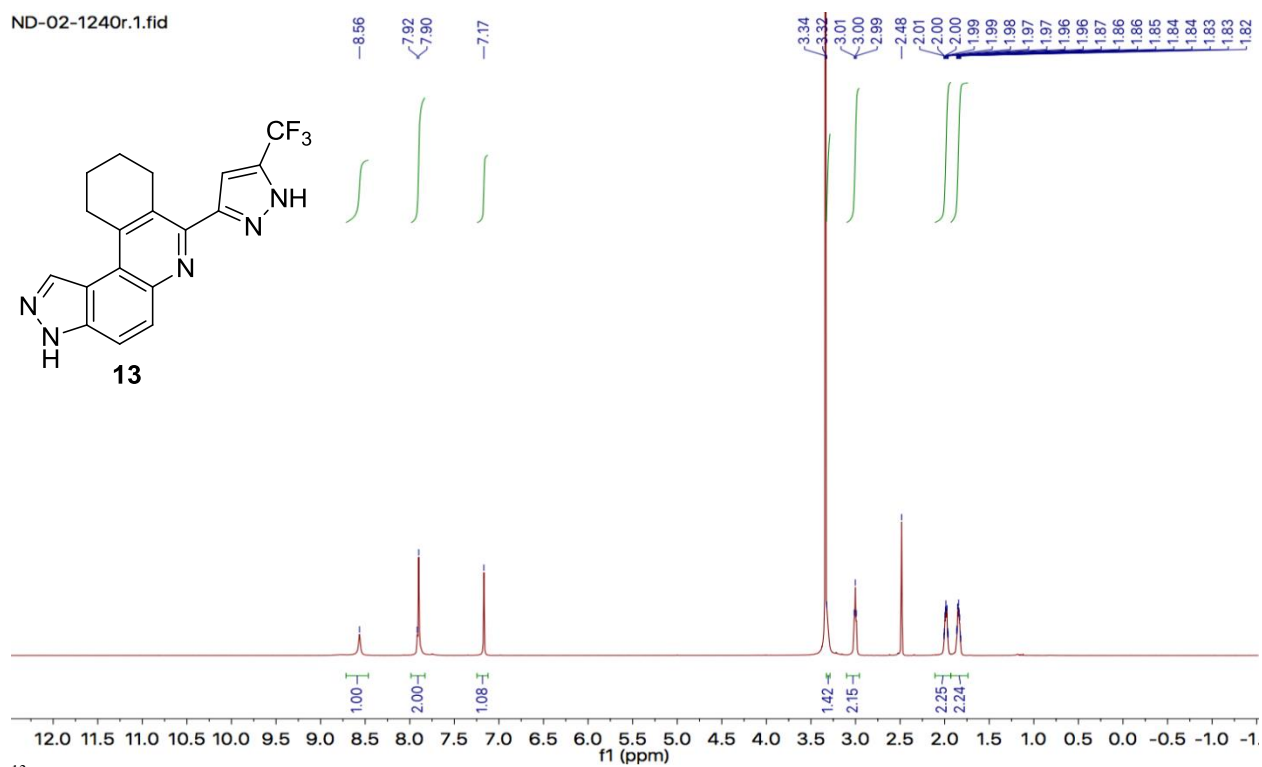

<sup>13</sup>C NMR of compound **13**

ND-02-1240r.2.fid

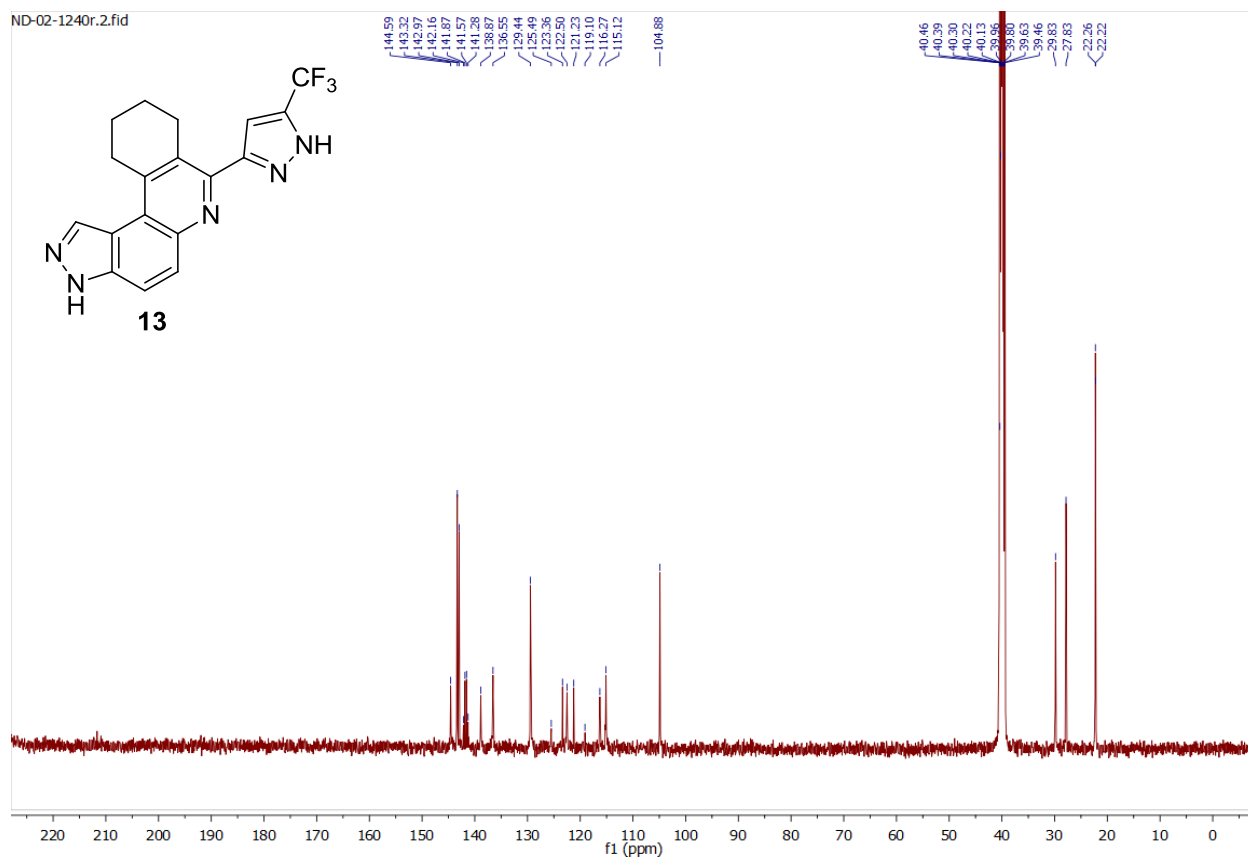

<sup>1</sup>H NMR of compound 14

ND-02-ph.1.fid

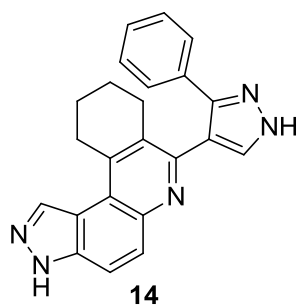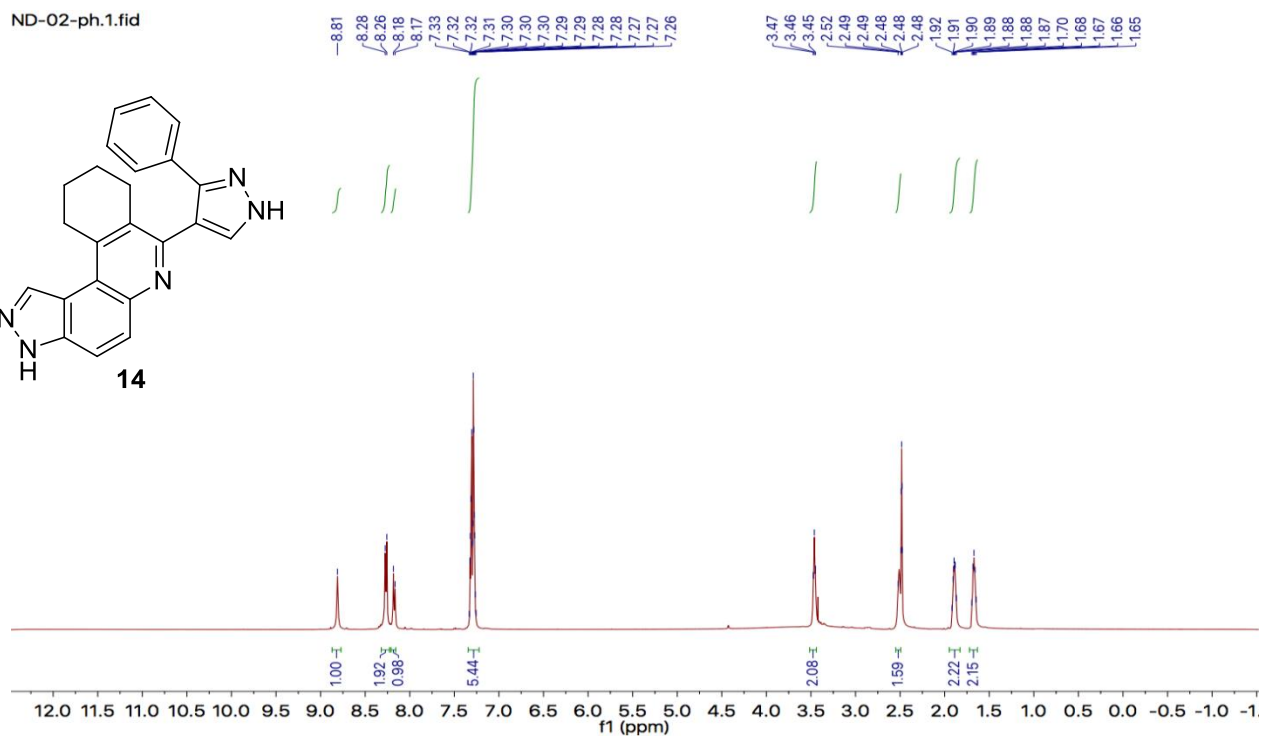

<sup>13</sup>C NMR of compound 14

ND-02-ph.2.fid

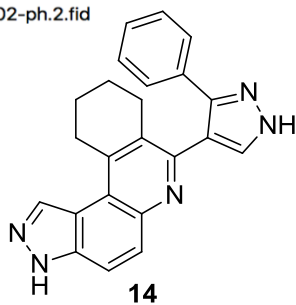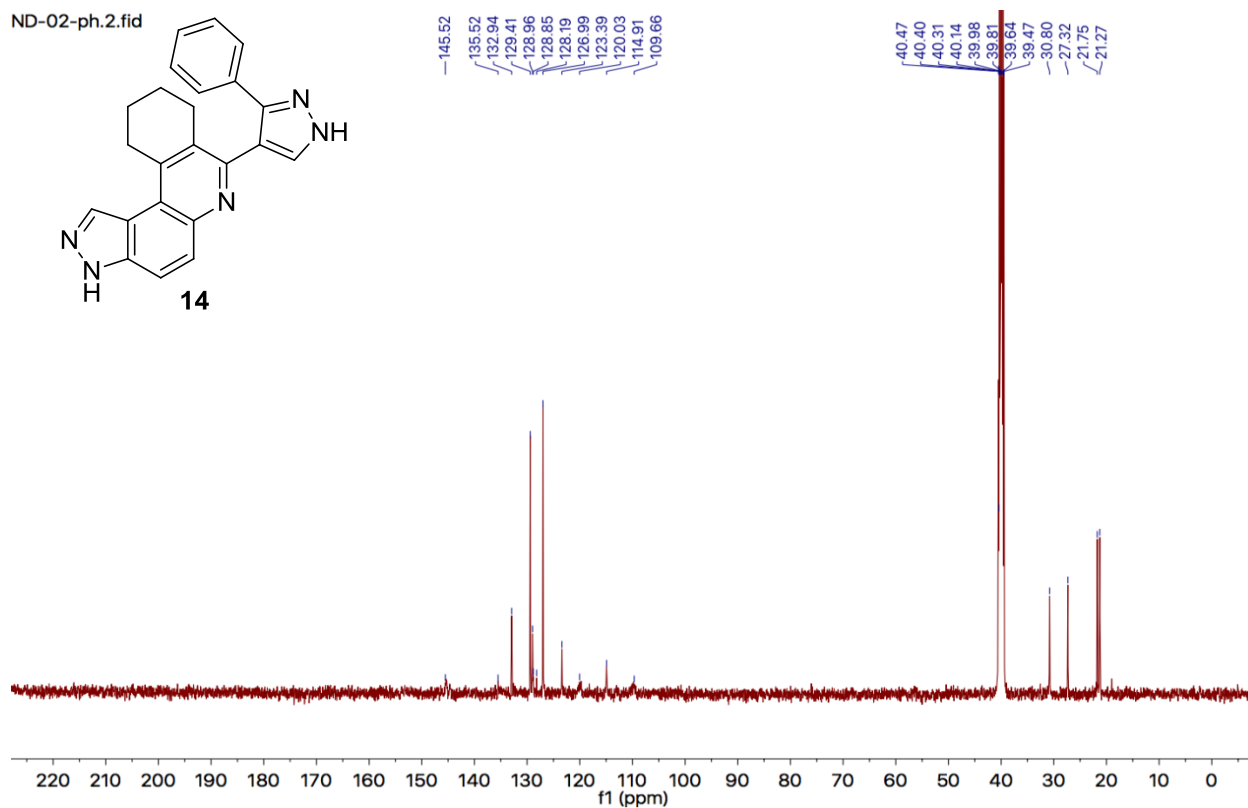

<sup>1</sup>H NMR of compound **15**

1310r.1.fid

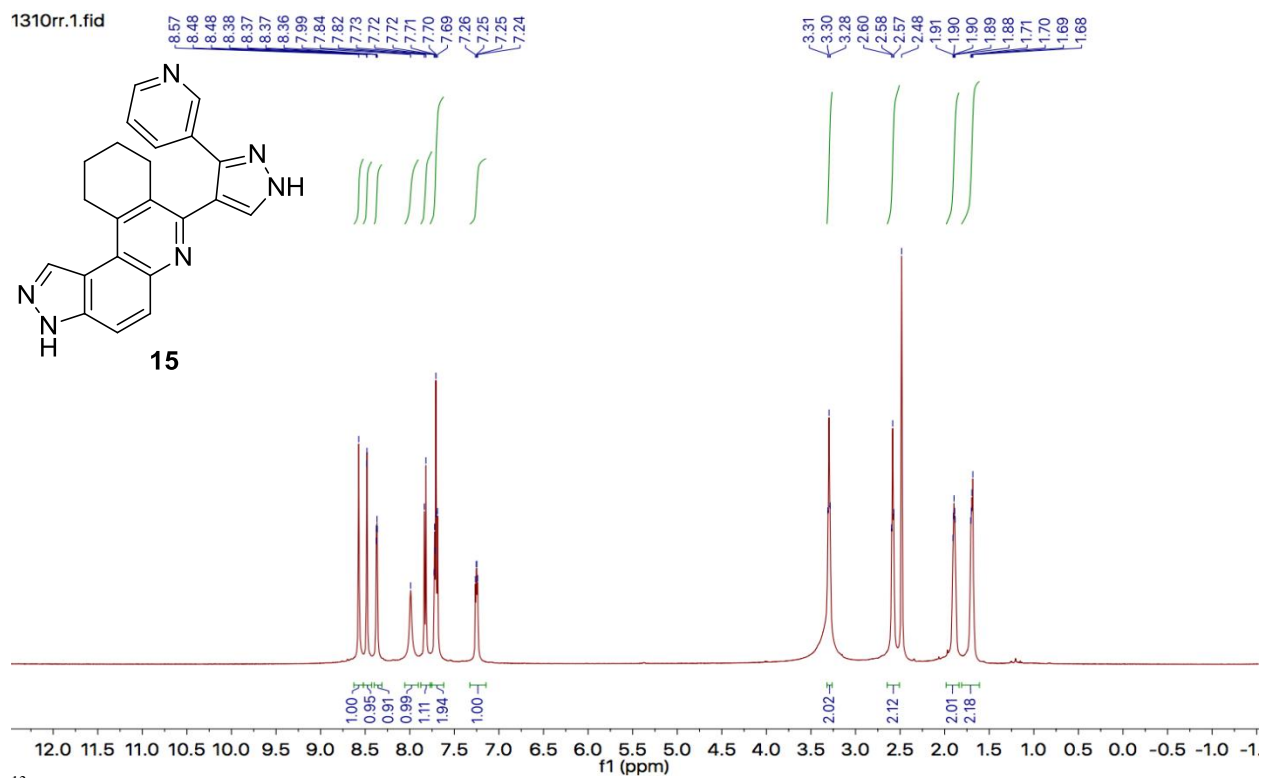

<sup>13</sup>C NMR of compound **15**

ND-02-1310r.2.fid

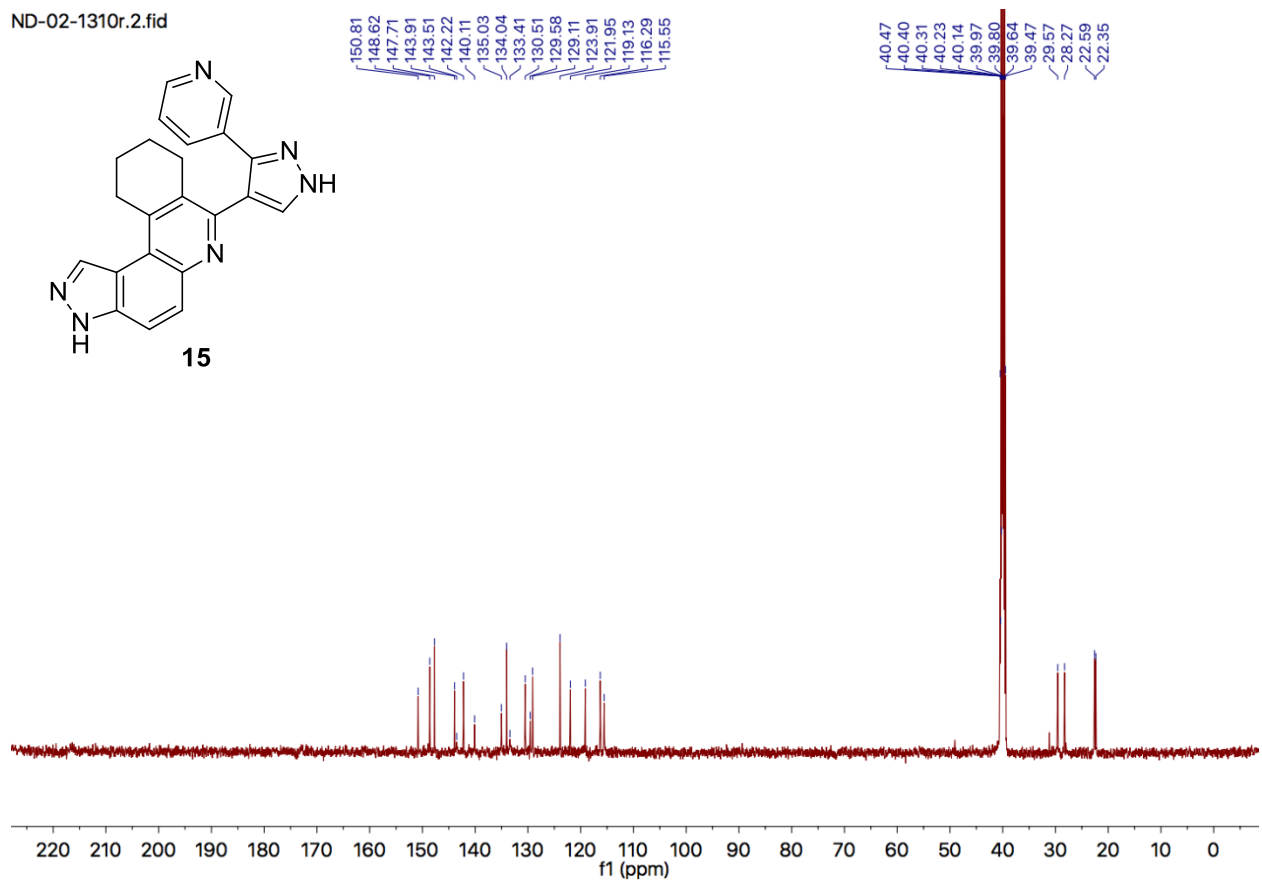



<sup>1</sup>H NMR of compound 16

ND-02-NPh1312.1.fid

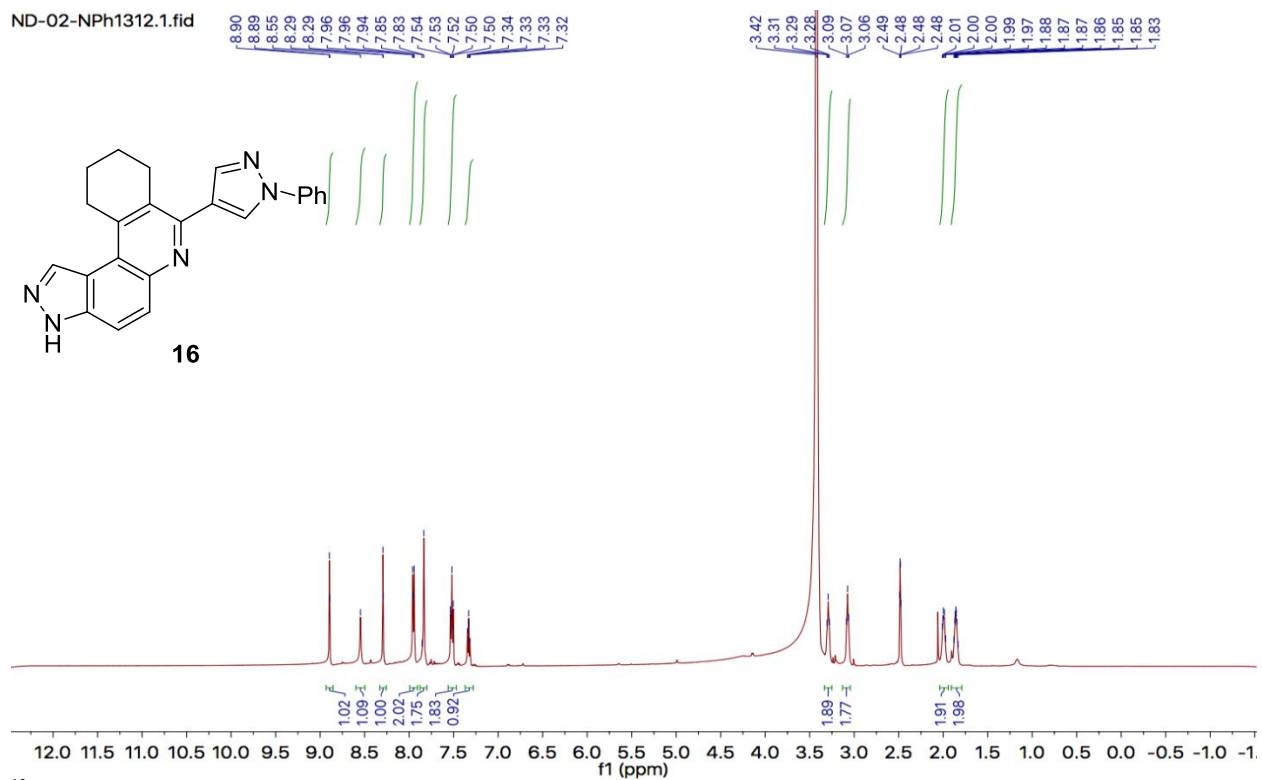

<sup>13</sup>C NMR of compound 16

ND-02-NPh1312.2.fid

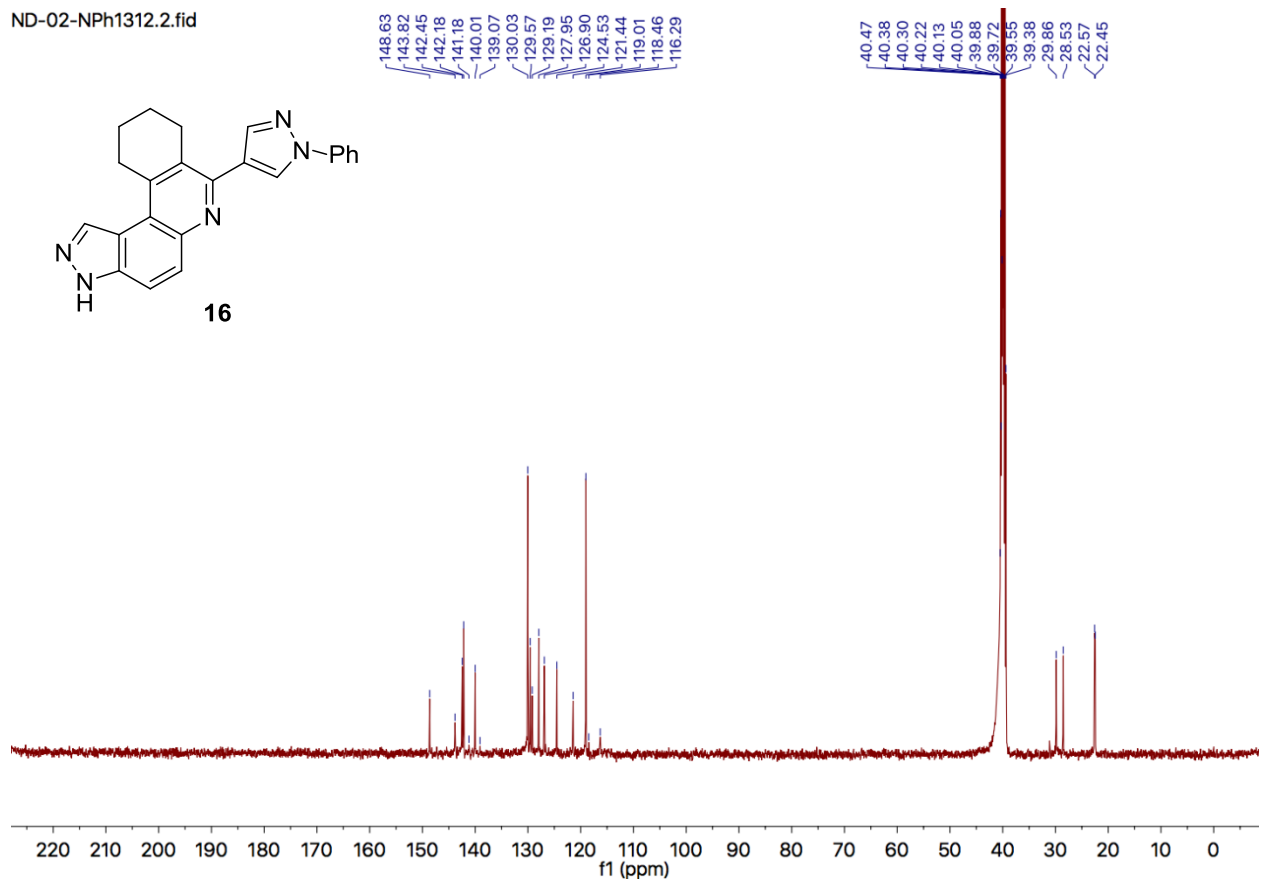

<sup>1</sup>H NMR of compound 17

1312rr.1.fid

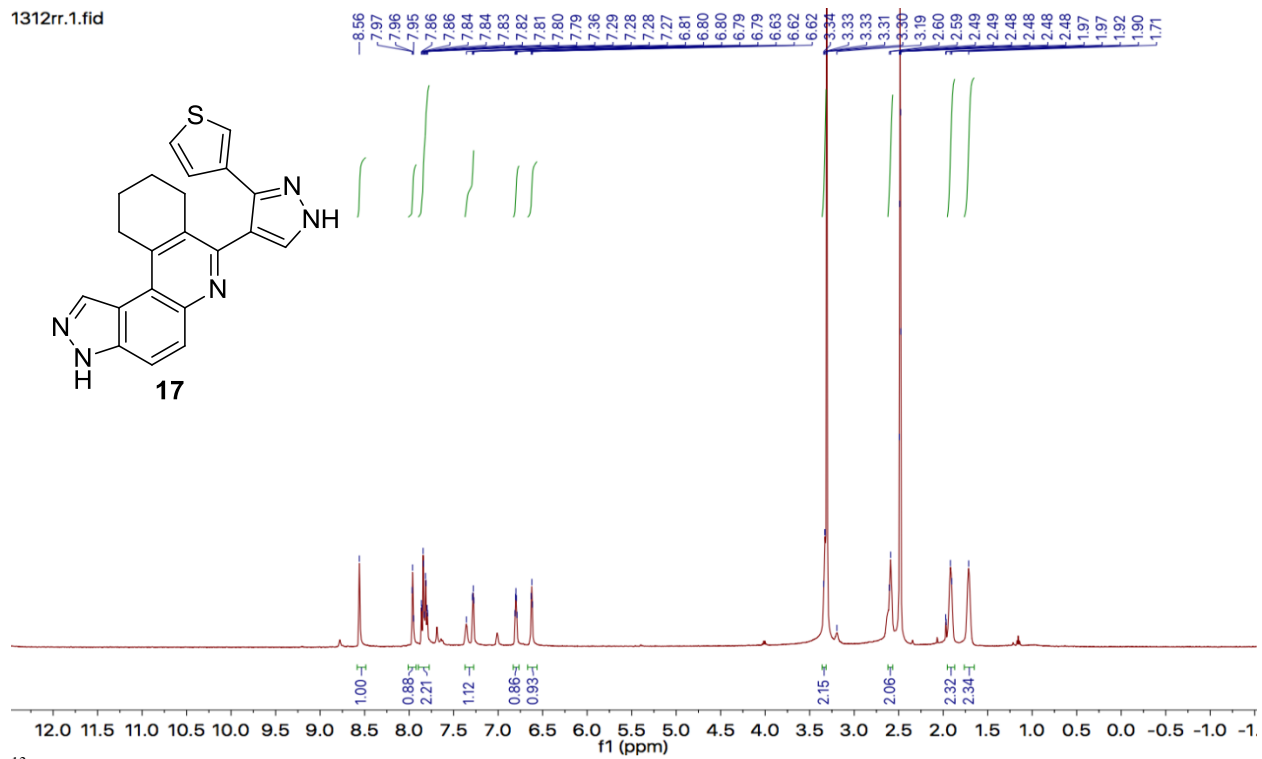

<sup>13</sup>C NMR of compound 17

ND-02-thio13111.2.fid

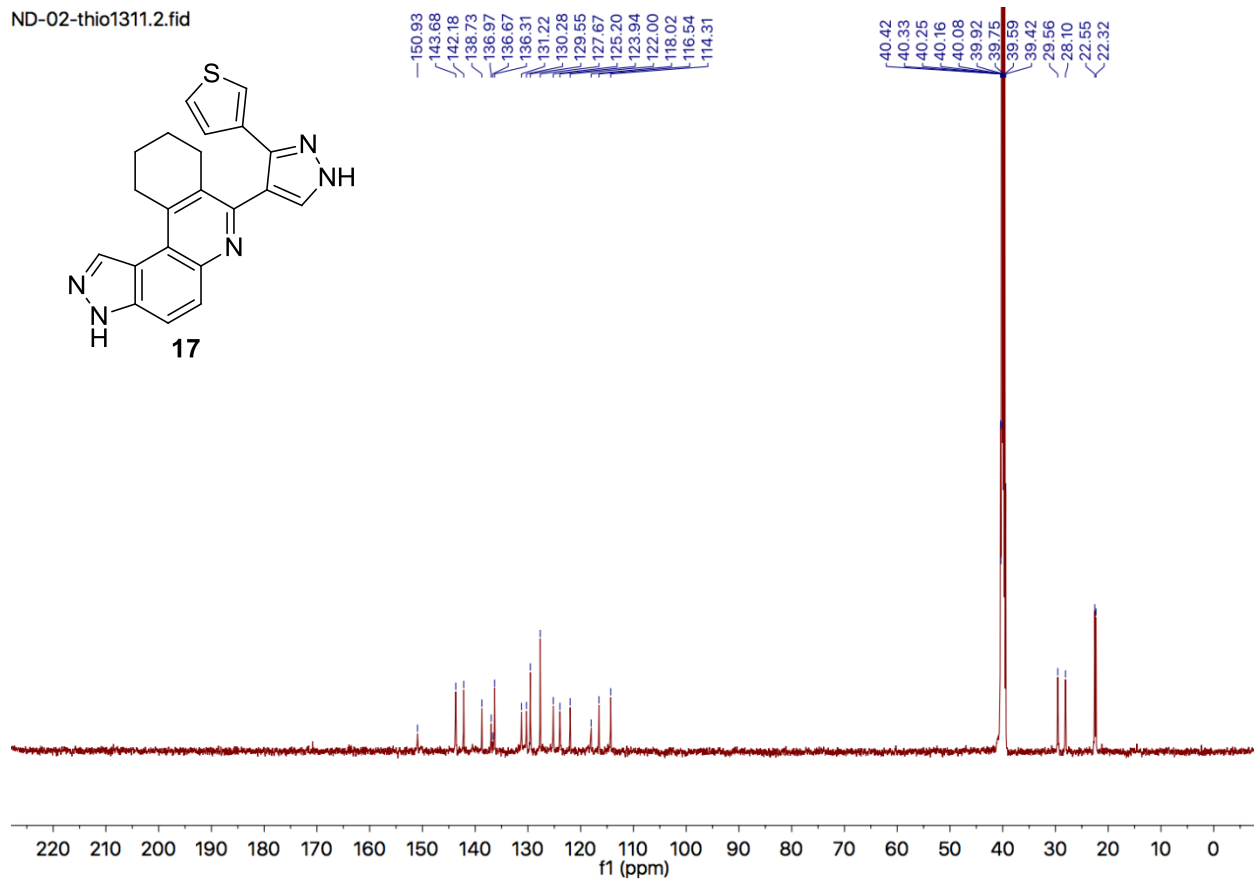

# <sup>1</sup>H NMR of compound 18

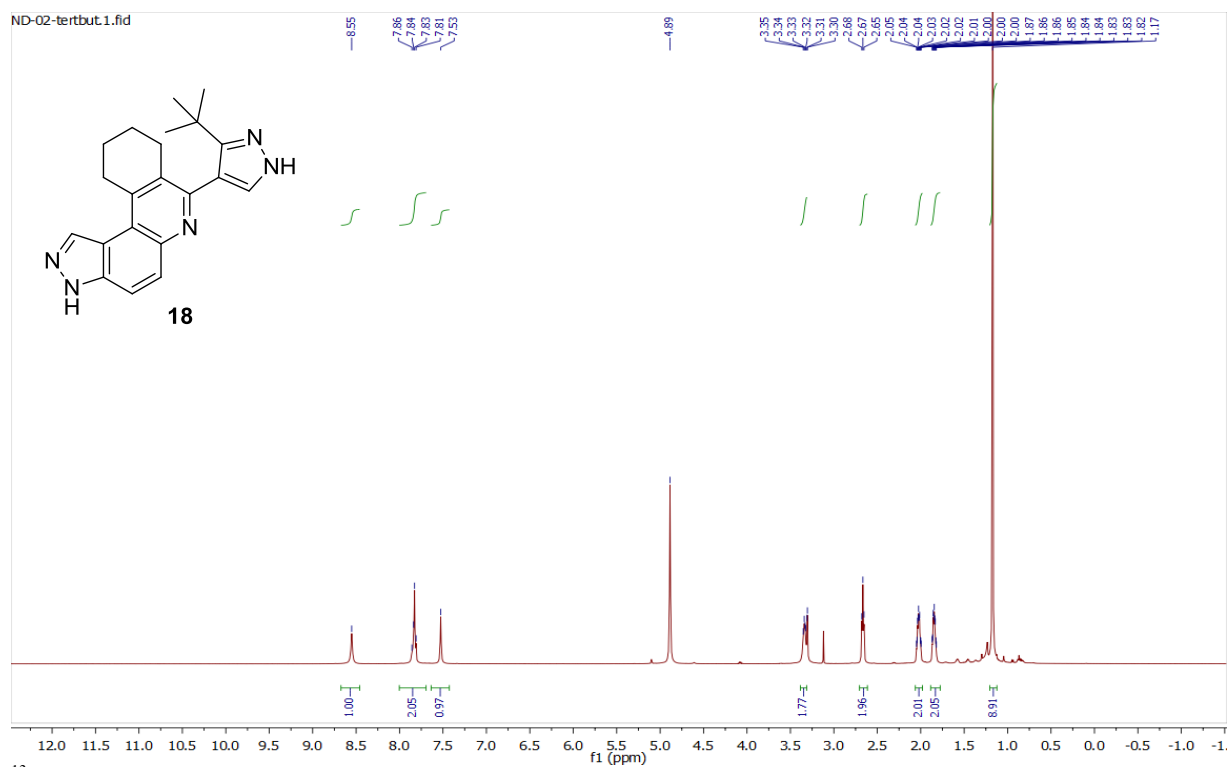

# <sup>13</sup>C NMR of compound 18

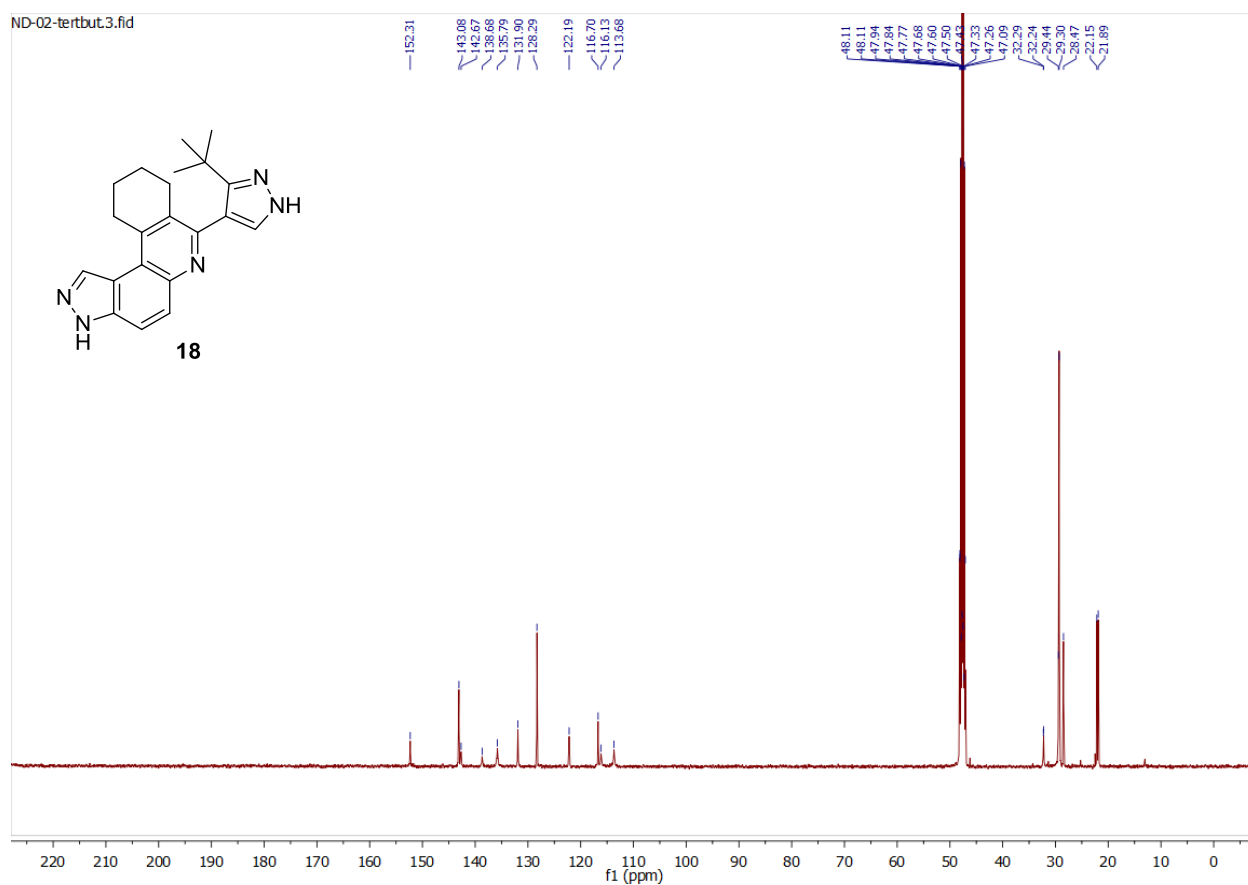

<sup>1</sup>H NMR of compound **19**

ND-02-1234r.1.fid

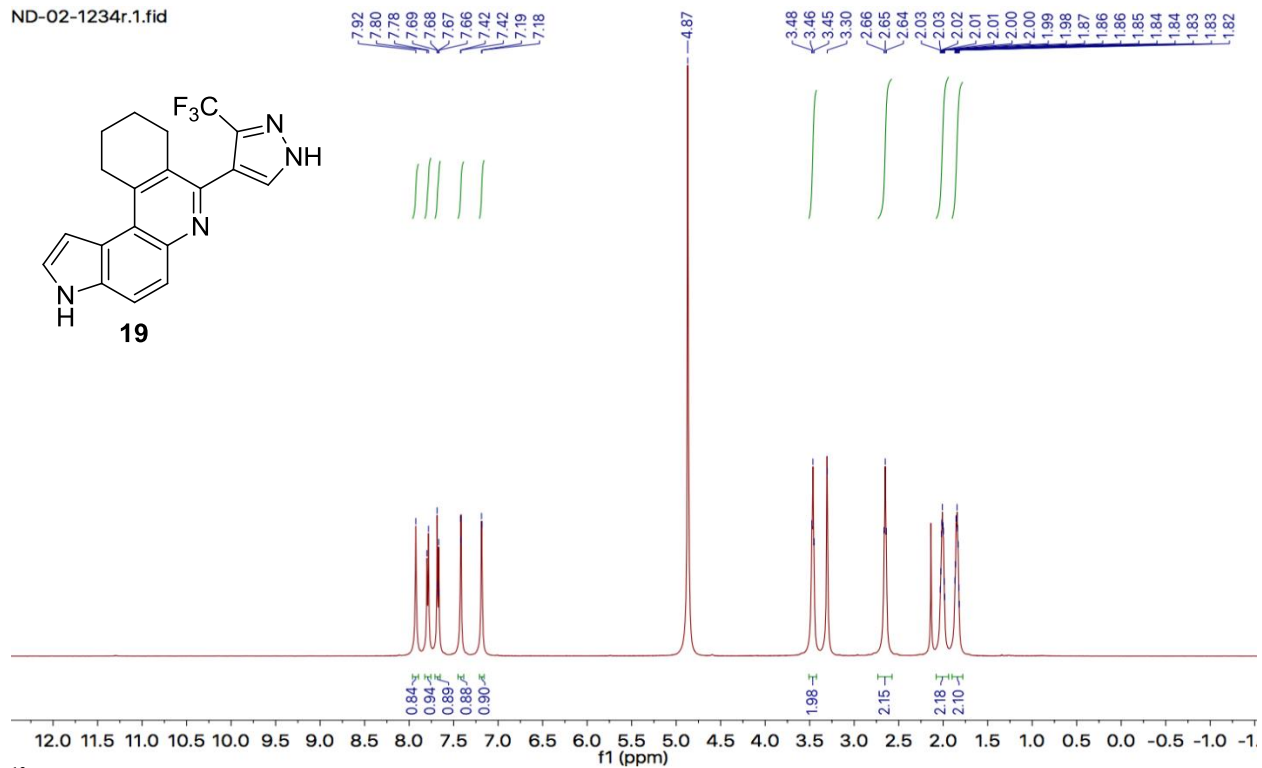

<sup>13</sup>C NMR of compound **19**

ND-02-1234r.2.fid

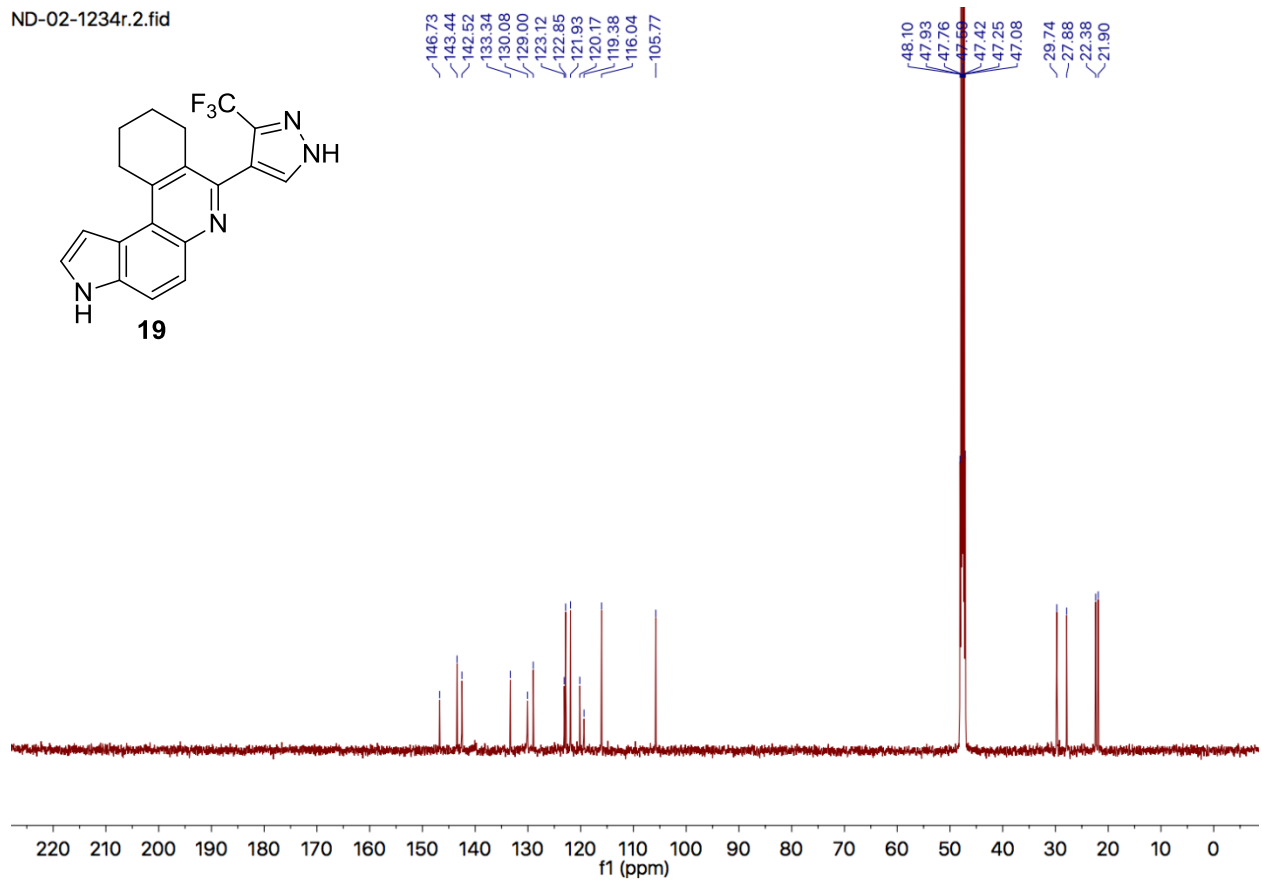

<sup>1</sup>H NMR of compound 20

ND-02-1294h.1.fid

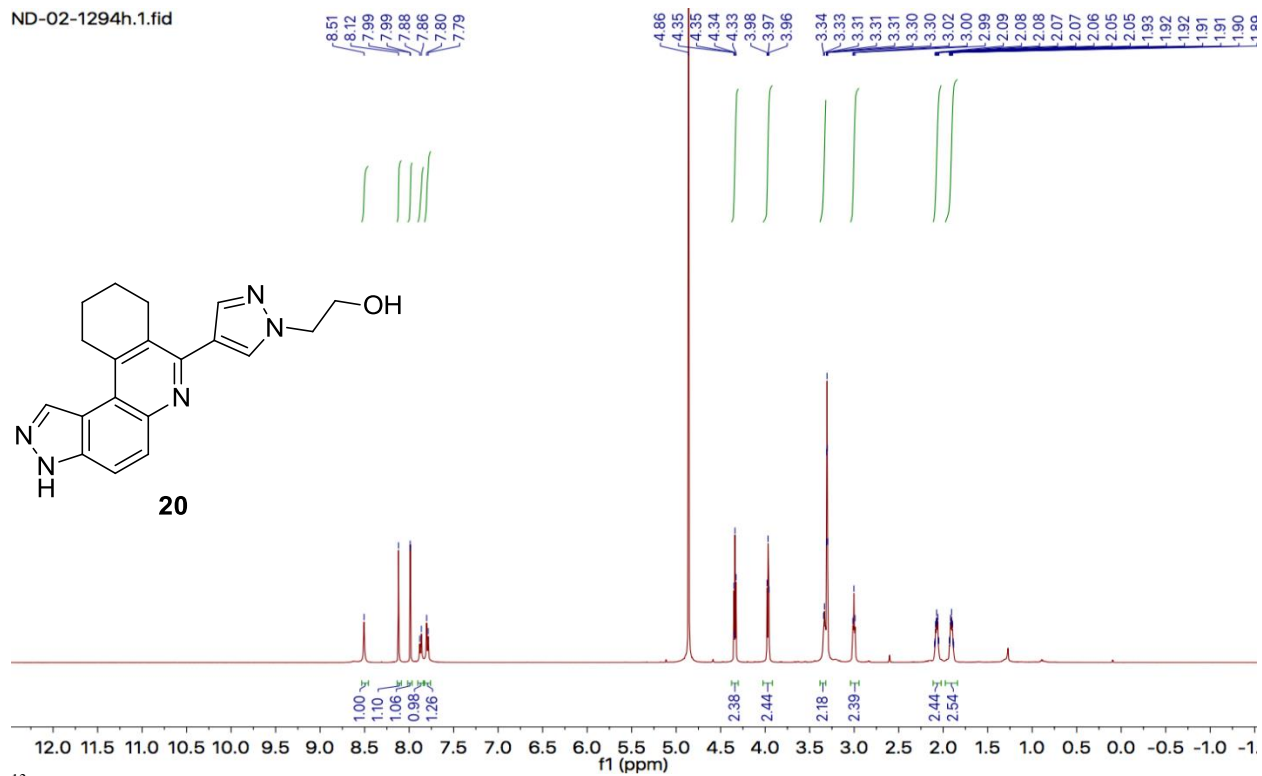

<sup>13</sup>C NMR of compound 20

ND-02-1294h.2.fid

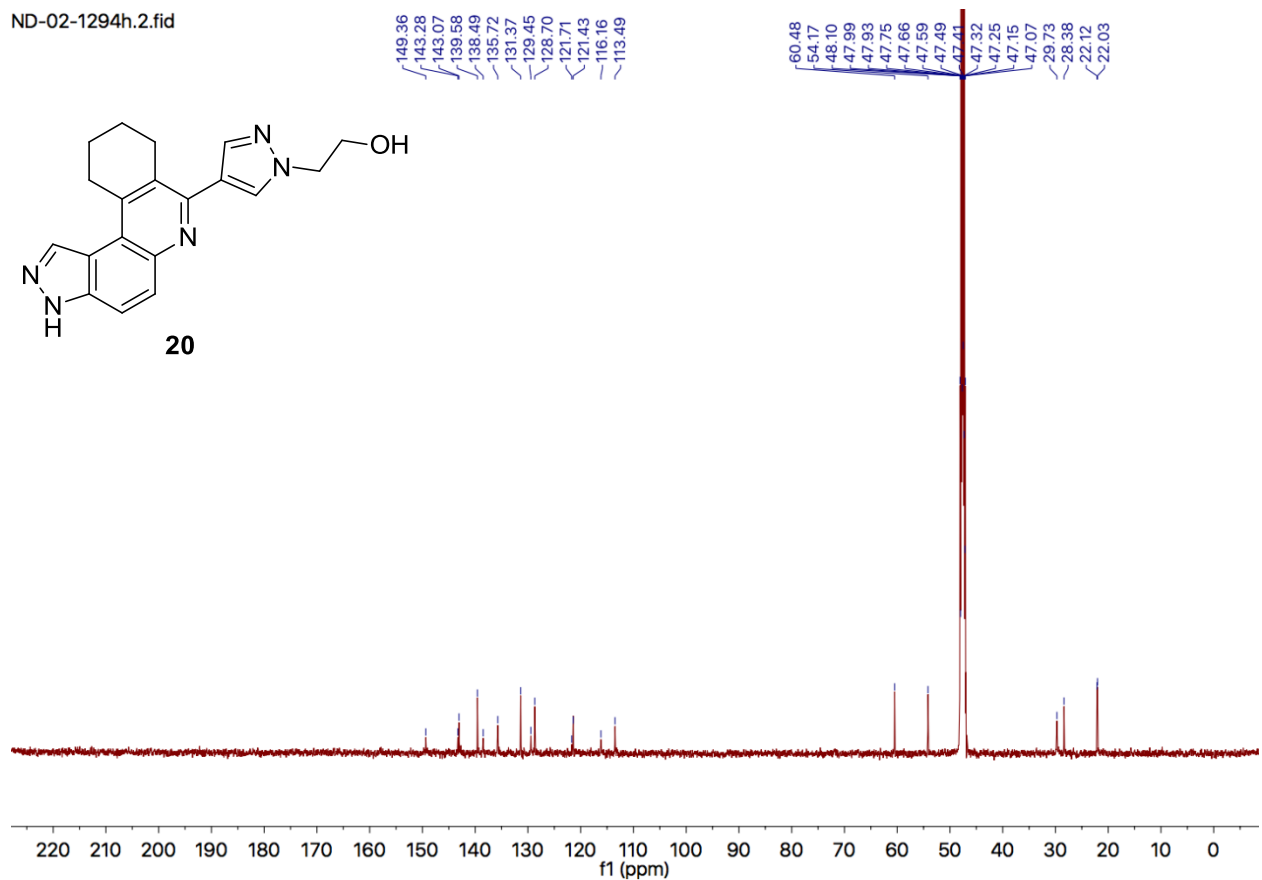

# <sup>1</sup>H NMR of compound 21

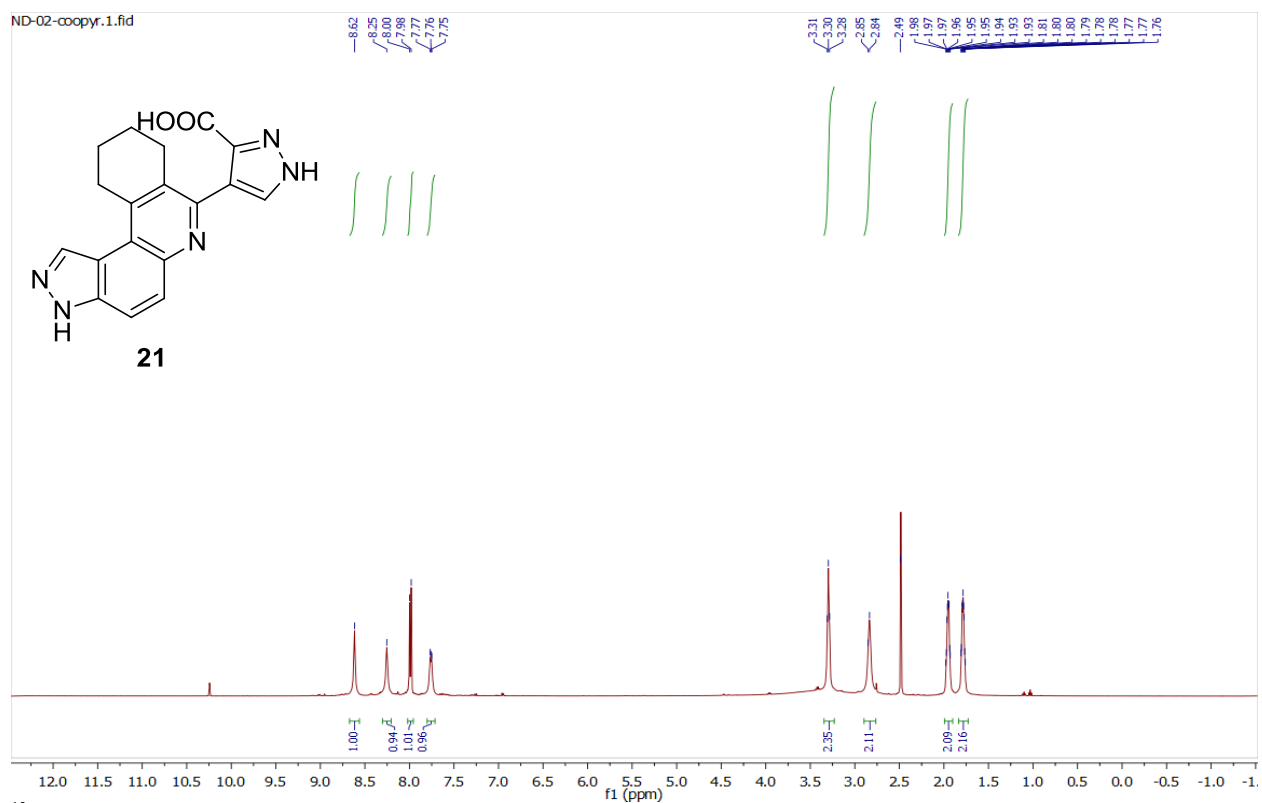

# <sup>13</sup>C NMR of compound 21

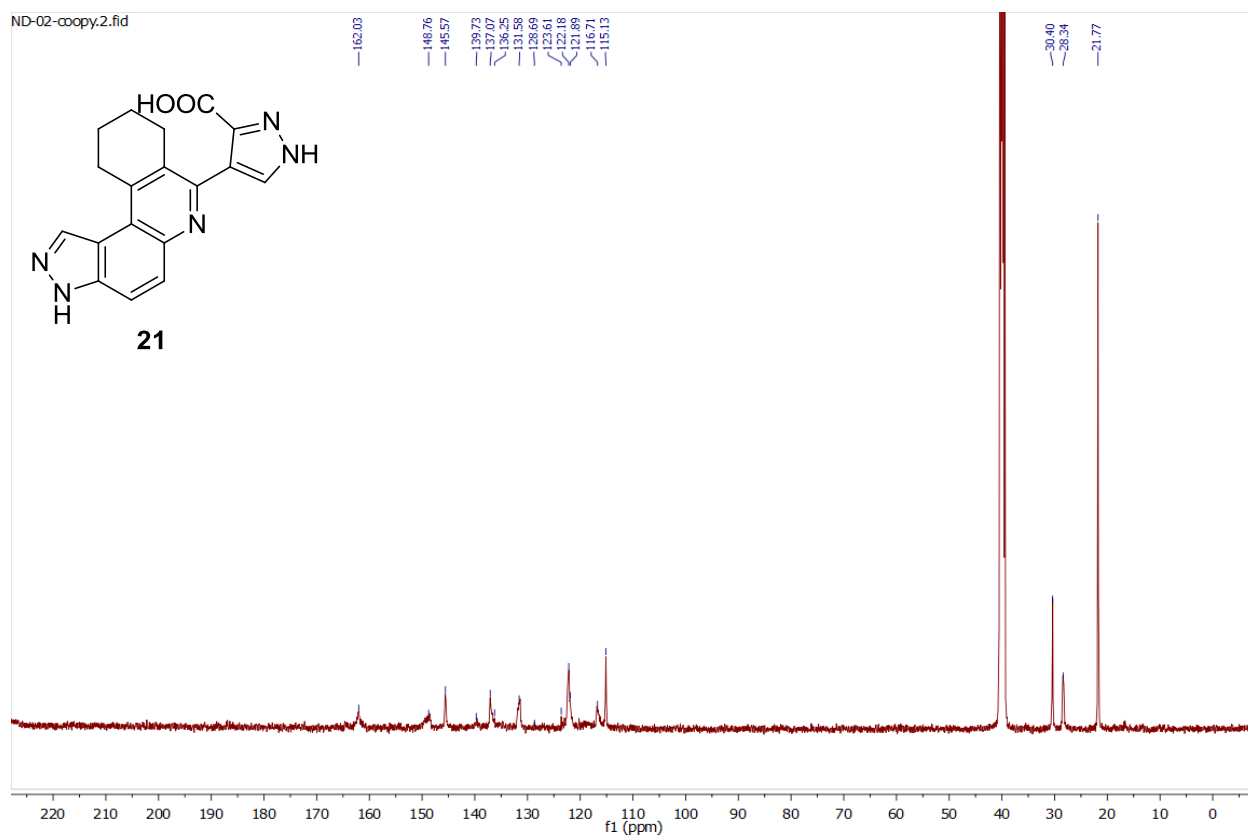

Supplement: fmc-10-823-s1.pdf [file fmc-10-823-s1.pdf]
